# Supplementary material
Source: Research Square preprint supplement (doi:10.21203/rs.3.rs-9600876/v1)
Supplement: Supplementary file 1 [file 6c29d71b8e8fbe7bd5f39105.xlsx]

## Sheet: Fig 3A
Well	Fluor	Target	Sample	Cq		Well	Fluor	Target	Sample	Cq
A01	SYBR	Actin	Raji	20.0158		B01	SYBR	IGKC1	Raji	15.8475
A02	SYBR	Actin	Raji	19.9797		B02	SYBR	IGKC1	Raji	15.6521
A03	SYBR	Actin	Raji	19.998		B03	SYBR	IGKC1	Raji	15.6967
A04	SYBR	IGKC	Raji	17.2451		B10	SYBR	ACTB	Raji	12.6863
A05	SYBR	IGKC	Raji	17.2087		B11	SYBR	ACTB	Raji	12.7177
A06	SYBR	IGKC	Raji	17.203		B12	SYBR	ACTB	Raji	12.9643
A07	SYBR	MZB1	Raji	22.5149		C01	SYBR	IGKC1	Caov3	34.7625
A08	SYBR	MZB1	Raji	22.5374		C02	SYBR	IGKC1	Caov3	32.4302
A09	SYBR	MZB1	Raji	22.5097		C03	SYBR	IGKC1	Caov3	29.9945
A10	SYBR	Actin	OVCAR3	18.7717		C10	SYBR	ACTB	Caov3	12.4931
A11	SYBR	Actin	OVCAR3	18.7781		C11	SYBR	ACTB	Caov3	12.5569
A12	SYBR	Actin	OVCAR3	18.8444		C12	SYBR	ACTB	Caov3	12.6728
B01	SYBR	Actin	HEK293	21.7332		E01	SYBR	IGKC1	BxPC3	34.8369
B02	SYBR	Actin	HEK293	21.6574		E02	SYBR	IGKC1	BxPC3	32.042
B03	SYBR	Actin	HEK293	21.6979		E03	SYBR	IGKC1	BxPC3	33.5885
B04	SYBR	IGKC	HEK293	31.9716		E10	SYBR	ACTB	BxPC3	13.8913
B05	SYBR	IGKC	HEK293	32.0568		E11	SYBR	ACTB	BxPC3	13.0457
B06	SYBR	IGKC	HEK293	29.3833		E12	SYBR	ACTB	BxPC3	13.2089
B07	SYBR	MZB1	HEK293	32.4517		G01	SYBR	IGKC1	MDA-MB-468	31.9881
B08	SYBR	MZB1	HEK293	32.9488		G02	SYBR	IGKC1	MDA-MB-468	30.2179
B09	SYBR	MZB1	HEK293	32.326		G03	SYBR	IGKC1	MDA-MB-468	30.172
B10	SYBR	Actin	TC-YIK	16.1853		G10	SYBR	ACTB	MDA-MB-468	12.0209
B11	SYBR	Actin	TC-YIK	16.0049		G11	SYBR	ACTB	MDA-MB-468	12.0452
B12	SYBR	Actin	TC-YIK	15.3562		G12	SYBR	ACTB	MDA-MB-468	12.2998
C01	SYBR	Actin	Ishikawa	20.5769
C02	SYBR	Actin	Ishikawa	20.4595		Well	Fluor	Target	Sample	Cq
C03	SYBR	Actin	Ishikawa	20.554		B02	SYBR	Actin	Caov3	18.5871
C04	SYBR	IGKC	Ishikawa	31.697		B03	SYBR	Actin	Caov3	18.7335
C05	SYBR	IGKC	Ishikawa	31.9336		B04	SYBR	Actin	Caov3	18.719
C06	SYBR	IGKC	Ishikawa	31.6349		B11	SYBR	Actin	Raji	27.183
C07	SYBR	MZB1	Ishikawa	32.4422		C02	SYBR	Actin	BxPC3	19.0064
C08	SYBR	MZB1	Ishikawa	32.7879		C03	SYBR	Actin	BxPC3	15.2023
C09	SYBR	MZB1	Ishikawa	31.9317		C04	SYBR	Actin	BxPC3	18.7085
C10	SYBR	IGKC	OVCAR3	30.703		C11	SYBR	Actin	Raji	27.0487
C11	SYBR	IGKC	OVCAR3	31.7664		D02	SYBR	Actin	MDA-MB-468	20.5021
C12	SYBR	IGKC	OVCAR3	31.2564		D03	SYBR	Actin	MDA-MB-468	20.5957
D01	SYBR	Actin	HEC-1-A	17.3006		D04	SYBR	Actin	MDA-MB-468	20.4102
D02	SYBR	Actin	HEC-1-A	17.2581		D11	SYBR	Actin	Raji	27.1846
D03	SYBR	Actin	HEC-1-A	17.2521		E08	SYBR	MZB1	Caov3	33.0631
D04	SYBR	IGKC	HEC-1-A	31.1013		E09	SYBR	MZB1	Caov3	28.9925
D05	SYBR	IGKC	HEC-1-A	29.6053		E10	SYBR	MZB1	Caov3	30.0327
D06	SYBR	IGKC	HEC-1-A	31.0516		F08	SYBR	MZB1	BxPC3	34.5681
D07	SYBR	MZB1	HEC-1-A	31.8543		F09	SYBR	MZB1	BxPC3	33.1068
D08	SYBR	MZB1	HEC-1-A	31.7149		F10	SYBR	MZB1	BxPC3	30.0008
D09	SYBR	MZB1	HEC-1-A	31.4351		G08	SYBR	MZB1	MDA-MB-468	31.6886
D10	SYBR	IGKC	TC-YIK	24.2505		G09	SYBR	MZB1	MDA-MB-468	32.209
D11	SYBR	IGKC	TC-YIK	24.4666		G10	SYBR	MZB1	MDA-MB-468	33.1394
D12	SYBR	IGKC	TC-YIK	27.3694		H08	SYBR	MZB1	Raji	23.5456
E01	SYBR	Actin	RL95	20.141		H09	SYBR	MZB1	Raji	23.48
E02	SYBR	Actin	RL95	20.1078		H10	SYBR	MZB1	Raji	23.5204
E03	SYBR	Actin	RL95	20.0994
E04	SYBR	IGKC	RL95	30.8537
E05	SYBR	IGKC	RL95	30.3953
E06	SYBR	IGKC	RL95	30.3506
E07	SYBR	MZB1	RL95	32.421
E08	SYBR	MZB1	RL95	32.205
E09	SYBR	MZB1	RL95	32.1187
E10	SYBR	MZB1	OVCAR3	32.1078
E11	SYBR	MZB1	OVCAR3	32.2857
E12	SYBR	MZB1	OVCAR3	32.5869
F01	SYBR	Actin	MDA-MB-231	18.177
F02	SYBR	Actin	MDA-MB-231	18.0897
F03	SYBR	Actin	MDA-MB-231	18.0646
F04	SYBR	IGKC	MDA-MB-231	31.8769
F05	SYBR	IGKC	MDA-MB-231	32.1079
F06	SYBR	IGKC	MDA-MB-231	31.2976
F07	SYBR	MZB1	MDA-MB-231	32.2385
F08	SYBR	MZB1	MDA-MB-231	32.2962
F09	SYBR	MZB1	MDA-MB-231	32.3762
F10	SYBR	MZB1	TC-YIK	29.3353
F11	SYBR	MZB1	TC-YIK	29.2351
F12	SYBR	MZB1	TC-YIK	29.2787
G01	SYBR	Actin	BT-474	18.7191
G02	SYBR	Actin	BT-474	18.689
G03	SYBR	Actin	BT-474	18.7557
G04	SYBR	IGKC	BT-474	31.0289
G05	SYBR	IGKC	BT-474	30.7897
G06	SYBR	IGKC	BT-474	30.5889
G07	SYBR	MZB1	BT-474	31.5983
G08	SYBR	MZB1	BT-474	31.6884
G09	SYBR	MZB1	BT-474	31.6045
H01	SYBR	Actin	HC827	19.4156
H02	SYBR	Actin	HC827	19.4184
H03	SYBR	Actin	HC827	19.4507
H04	SYBR	IGKC	HC827	31.0335
H05	SYBR	IGKC	HC827	30.5681
H06	SYBR	IGKC	HC827	29.8979
H07	SYBR	MZB1	HC827	31.8136
H08	SYBR	MZB1	HC827	32.2502
H09	SYBR	MZB1	HC827	32.5228

## Sheet: Fig 3BC
Well	Fluor	Target	Sample	Cq		Well	Fluor	Target	Sample	Cq		Well	Fluor	Target	Sample	Cq			No-Met					Met
B04	SYBR	Actin	P01	12.5643		E04	SYBR	MZB1	P05	33.7098		E04	SYBR	MZB1	P01	34.0382			P01	P02	P03	P04		P05	P06	P07	P08
B05	SYBR	Actin	P02	11.6566		E05	SYBR	MZB1	P05	33.7342		E05	SYBR	MZB1	P01	30.0468		IGKC	32.5096	32.0064	32.2904	33.375		30.656	32.4226	32.2444	32.2778
B06	SYBR	Actin	P03	11.023		E06	SYBR	MZB1	P05	32.7215		E06	SYBR	MZB1	P01	32.7701			32.6962	33.0919	32.7505	33.0892		30.5961	32.6247	33.2791	32.5263
B07	SYBR	Actin	P05	12.1014		E07	SYBR	ACTB	P05	16.8755		E07	SYBR	ACTB	P01	14.9486			33.0731	32.2742	32.5933	33.0043		30.1573	31.9934	32.1637	32.2571
B09	SYBR	Actin	P06	12.8354		E08	SYBR	ACTB	P05	16.9873		E08	SYBR	ACTB	P01	15.0528		Δt	20.0329	20.5571	21.3957	22.276		18.5639	19.5832	17.7006	16.8524
B10	SYBR	Actin	P07	14.5733		E09	SYBR	ACTB	P05	17.0041		E09	SYBR	ACTB	P01	15.1222			20.2194	21.6426	21.8557	21.9901		18.5039	19.7852	18.7353	17.1009
B11	SYBR	Actin	P08	15.5174		F04	SYBR	MZB1	P06	33.1317		F04	SYBR	MZB1	P04	32.094			20.5964	20.8249	21.6986	21.9053		18.0652	19.154	17.6199	16.8317
B12	SYBR	Actin	P04	11.2432		F05	SYBR	MZB1	P06	33.1876		F05	SYBR	MZB1	P04	32.0309			20.2829	21.0082	21.65	22.0571	21.2495	18.3777	19.5075	18.0186	16.9283
C04	SYBR	Actin	P01	13.2235		F06	SYBR	MZB1	P06	34.349		F06	SYBR	MZB1	P04	32.1605		ΔΔt	-0.966676	-0.241334	0.400433	0.807578		-2.87187	-1.74209	-3.23091	-4.32124
C05	SYBR	Actin	P02	11.3012		F07	SYBR	ACTB	P06	16.0706		F07	SYBR	ACTB	P04	13.3961		2^-ΔΔt	1.95433	1.18209	0.757631	0.57134		7.32012	3.34519	9.38863	19.9905
C06	SYBR	Actin	P03	10.8974		F08	SYBR	ACTB	P06	16.0387		F08	SYBR	ACTB	P04	14.1761
C07	SYBR	Actin	P05	12.0656		F09	SYBR	ACTB	P06	16.0193		F09	SYBR	ACTB	P04	13.3857			P01	P02	P03	P04		P05	P06	P07	P08
C09	SYBR	Actin	P06	13.7784		G04	SYBR	MZB1	P07	35.0598		G04	SYBR	MZB1	P03	29.397		ACTB	12.5643	11.6566	11.023	11.2432		12.1014	12.8354	14.5733	15.5174
C10	SYBR	Actin	P07	14.5225		G05	SYBR	MZB1	P07	34.1169		G05	SYBR	MZB1	P03	30.4288				11.3012	10.8974	11.0257		12.0656		14.5225	15.3641
C11	SYBR	Actin	P08	15.3641		G06	SYBR	MZB1	P07	33.6257		G06	SYBR	MZB1	P03	30.5322			12.3893	11.3901	10.764	11.0283		12.1094	12.8435	14.5357	15.3949
C12	SYBR	Actin	P04	11.0257		G07	SYBR	ACTB	P07	15.251		G07	SYBR	ACTB	P03	13.3714		mean	12.4768	11.4493	10.8948	11.0991		12.0921	12.8395	14.5438	15.4254
D04	SYBR	Actin	P01	12.3893		G08	SYBR	ACTB	P07	15.2743		G08	SYBR	ACTB	P03	13.2897
D05	SYBR	Actin	P02	11.3901		G09	SYBR	ACTB	P07	15.308		G09	SYBR	ACTB	P03	13.3748
D06	SYBR	Actin	P03	10.764		H04	SYBR	MZB1	P08	30.0369		H04	SYBR	MZB1	P02	28.0396
D07	SYBR	Actin	P05	12.1094		H05	SYBR	MZB1	P08	33.7251		H05	SYBR	MZB1	P02	28.3333			P01	P02	P03	P04		P05	P06	P07	P08
D09	SYBR	Actin	P06	12.8435		H06	SYBR	MZB1	P08	35.2286		H06	SYBR	MZB1	P02	28.8704		MZB1	34.0382	28.0396	29.397	32.094		33.7098	33.1317	35.0598	30.0369
D10	SYBR	Actin	P07	14.5357		H07	SYBR	ACTB	P08	15.1123		H07	SYBR	ACTB	P02	13.4011			30.0468	28.3333	30.4288	32.0309		33.7342	33.1876	34.1169	33.7251
D11	SYBR	Actin	P08	15.3949		H08	SYBR	ACTB	P08	15.1761		H08	SYBR	ACTB	P02	13.3917			32.7701	28.8704	30.5322	32.1605		32.7215	34.349	33.6257	35.2286
D12	SYBR	Actin	P04	11.0283		H09	SYBR	ACTB	P08	15.1873		H09	SYBR	ACTB	P02	14.1957		Δt	18.9969	14.6433	16.0517	18.7031		16.7058	17.1124	19.7519	14.8496
E04	SYBR	IGKC	P01	32.5096															15.0056	14.937	17.0835	18.64		16.7302	17.1683	18.8089	18.5378
E05	SYBR	IGKC	P02	32.0064															17.7288	15.474	17.1869	18.7696		15.7174	18.3297	18.3178	20.0414
E06	SYBR	IGKC	P03	32.2904
E07	SYBR	IGKC	P05	30.656															P01	P02	P03	P04		P05	P06	P07	P08
E09	SYBR	IGKC	P06	32.4226														ACTB	14.9486	13.4011	13.3714	13.3961		16.8755	16.0706	15.251	15.1123
E10	SYBR	IGKC	P07	32.2444															15.0528	13.3917	13.2897			16.9873	16.0387	15.2743	15.1761
E11	SYBR	IGKC	P08	32.2778															15.1222		13.3748	13.3857		17.0041	16.0193	15.308	15.1873
E12	SYBR	IGKC	P04	33.375														mean	15.0412	13.3964	13.3453	13.3909		16.9556	16.0429	15.2778	15.1586
F04	SYBR	IGKC	P01	32.6962
F05	SYBR	IGKC	P02	33.0919
F06	SYBR	IGKC	P03	32.7505
F07	SYBR	IGKC	P05	30.5961
F09	SYBR	IGKC	P06	32.6247
F10	SYBR	IGKC	P07	33.2791
F11	SYBR	IGKC	P08	32.5263
F12	SYBR	IGKC	P04	33.0892
G04	SYBR	IGKC	P01	33.0731
G05	SYBR	IGKC	P02	32.2742
G06	SYBR	IGKC	P03	32.5933
G07	SYBR	IGKC	P05	30.1573
G09	SYBR	IGKC	P06	31.9934
G10	SYBR	IGKC	P07	32.1637
G11	SYBR	IGKC	P08	32.2571
G12	SYBR	IGKC	P04	33.0043

## Sheet: Fig 4E
Wells	Fluor	Target	sample	Cq			HC827 Control	HC827 OE-TFAP2C				HC827 Control	HC827 OE-TFAP2C
C03	SYBR	ACTB	HC827 Control	16.28		TFAP2C	25.78	19.44			IGKC	28.33	25.16
C04	SYBR	ACTB	HC827 Control	16.19			25.73	19.48				28.19	25.06
C05	SYBR	ACTB	HC827 Control	16.33			25.77	19.48				28.28	25.19
C06	SYBR	TFAP2C	HC827 Control	25.78		Δt	9.51333	3.22667			Δt	12.11	-2.6
C07	SYBR	TFAP2C	HC827 Control	25.73			9.46333	3.26667				11.97	-2.7
C08	SYBR	TFAP2C	HC827 Control	25.77			9.50333	3.26667				12.06	-2.57
D03	SYBR	ACTB	HC827 OE-TFAP2C	16.23			9.49333					8.36667
D04	SYBR	ACTB	HC827 OE-TFAP2C	16.21		ΔΔt	0.02	-6.26667			ΔΔt	0.0633333	-1.90667
D05	SYBR	ACTB	HC827 OE-TFAP2C	16.2			-0.03	-6.22667				-0.0766667	-2.00667
D06	SYBR	TFAP2C	HC827 OE-TFAP2C	19.44			0.01	-6.22667				0.0133333	-1.87667
D07	SYBR	TFAP2C	HC827 OE-TFAP2C	19.48		2^-ΔΔt	0.986233	76.9936			2^-ΔΔt	0.95705	3.74942
D08	SYBR	TFAP2C	HC827 OE-TFAP2C	19.48			1.02101	74.8882				1.05458	4.01853
							0.993092	74.8882				0.990801	3.67226
G07	SYBR	IGKC	HC827 Control	28.33
G08	SYBR	IGKC	HC827 Control	28.19			HC827 Control	HC827 OE-TFAP2C				HC827 Control	HC827 OE-TFAP2C
G09	SYBR	IGKC	HC827 Control	28.28		ACTB	16.28	16.23			ACTB	19.91	18.72
G10	SYBR	ACTB	HC827 Control	19.91			16.19	16.21				19.93	18.66
G11	SYBR	ACTB	HC827 Control	19.93			16.33	16.2				19.86	18.72
G12	SYBR	ACTB	HC827 Control	19.86		mean	16.2667	16.2133			mean	19.9	18.7
H07	SYBR	IGKC	HC827 OE-TFAP2C	25.16
H08	SYBR	IGKC	HC827 OE-TFAP2C	25.06
H09	SYBR	IGKC	HC827 OE-TFAP2C	25.19
H10	SYBR	ACTB	HC827 OE-TFAP2C	18.72
H11	SYBR	ACTB	HC827 OE-TFAP2C	18.66
H12	SYBR	ACTB	HC827 OE-TFAP2C	18.72
A03	SYBR	ACTB	OVCAR3 PCDH	16.23			OVCAR3 Control	OVCAR3 OE-TFAP2C				OVCAR3 Control	OVCAR3 OE-TFAP2C
A04	SYBR	ACTB	OVCAR3 Control	16.24		TFAP2C	23.33	27.31			IGKC	23.31	28.14
A05	SYBR	ACTB	OVCAR3 Control	16.19			23.33	27.41				23.28	28.05
A06	SYBR	TFAP2C	OVCAR3 Control	23.33			23.3	27.34				23.42	28.25
A07	SYBR	TFAP2C	OVCAR3 Control	23.33		Δt	7.11	-0.45			Δt	7.09	0.38
A08	SYBR	TFAP2C	OVCAR3 Control	23.3			7.11	-0.35				7.06	0.29
A09	SYBR	IGKC	OVCAR3 Control	23.31			7.08	-0.42				7.2	0.49
A10	SYBR	IGKC	OVCAR3 Control	23.28			7.1					7.11667
A11	SYBR	IGKC	OVCAR3 Control	23.42		ΔΔt	0.01	-7.55			ΔΔt	-0.0266667	-6.73667
	SYBR						0.01	-7.45				-0.0566667	-6.82667
B03	SYBR	ACTB	OVCAR3 OE-TFAP2C	27.77			-0.02	-7.52				0.0833333	-6.62667
B04	SYBR	ACTB	OVCAR3 OE-TFAP2C	27.72		2^-ΔΔt	0.993092	187.403			2^-ΔΔt	1.01866	106.645
B05	SYBR	ACTB	OVCAR3 OE-TFAP2C	27.79			0.993092	174.853				1.04006	113.509
B06	SYBR	TFAP2C	OVCAR3 OE-TFAP2C	27.31			1.01396	183.546				0.943874	98.8156
B07	SYBR	TFAP2C	OVCAR3 OE-TFAP2C	27.41
B08	SYBR	TFAP2C	OVCAR3 OE-TFAP2C	27.34			OVCAR3 Control	OVCAR3 OE-TFAP2C				OVCAR3 Control	OVCAR3 OE-TFAP2C
B09	SYBR	IGKC	OVCAR3 OE-TFAP2C	28.14		ACTB	16.23	27.77			ACTB	16.23	27.77
B10	SYBR	IGKC	OVCAR3 OE-TFAP2C	28.05			16.24	27.72				16.24	27.72
B11	SYBR	IGKC	OVCAR3 OE-TFAP2C	28.25			16.19	27.79				16.19	27.79
						mean	16.22	27.76			mean	16.22	27.76

## Sheet: Fig 5F
Well	Fluor	Target	Sample	Cq		OVCAR3
A01	SYBR	ISG	Control	21.2077			Control	OE-IGKC
A02	SYBR	ISG	Control	21.2512		ACTB	17.73	16.2
A03	SYBR	ISG	Control	21.1655			17.72	16.21
A07	SYBR	KC-2	Control	29.1649			17.63	16.22
A08	SYBR	KC-2	Control	29.1916			17.6933	16.21
A09	SYBR	KC-2	Control	29.2866
A10	SYBR	OAS1	Control	25.3095			Control	OE-IGKC			Control	OE-IGKC			Control	OE-IGKC			Control	OE-IGKC
A11	SYBR	OAS1	Control	25.3924		IGKC	29.16	12.66		ISG15	21.21	20.1		OAS1	25.31	24.2		OASL	25.8	25.04
A12	SYBR	OAS1	Control	25.4999			29.19	12.68			21.25	20.04			25.39	24.28			25.78	24.99
B01	SYBR	ISG	OE-IGKC	20.103			29.29	12.62			21.17	20.12			25.5	24.38			25.62	25.07
B02	SYBR	ISG	OE-IGKC	20.0434		Δt	11.4667	-3.55		Δt	3.51667	3.89		Δt	7.61667	7.99		Δt	8.10667	8.83
B03	SYBR	ISG	OE-IGKC	20.1225			11.4967	-3.53			3.55667	3.83			7.69667	8.07			8.08667	8.78
B07	SYBR	KC-2	OE-IGKC	12.6598			11.5967	-3.59			3.47667	3.91			7.80667	8.17			7.92667	8.86
B08	SYBR	KC-2	OE-IGKC	12.6825			11.52				3.51667				7.70667				8.04
B09	SYBR	KC-2	OE-IGKC	12.6213		ΔΔt	-0.0533333	-15.07		ΔΔt	0	0.373333		ΔΔt	-0.09	0.283333		ΔΔt	0.0666667	0.79
B10	SYBR	OAS1	OE-IGKC	24.1991			-0.0233333	-15.05			0.04	0.313333			-0.01	0.363333			0.0466667	0.74
B11	SYBR	OAS1	OE-IGKC	24.281			0.0766667	-15.11			-0.04	0.393333			0.1	0.463333			-0.113333	0.82
B12	SYBR	OAS1	OE-IGKC	24.3812		2^-ΔΔt	1.03766	34397.1		2^-ΔΔt	1	0.771997		2^-ΔΔt	1.06437	0.82169		2^-ΔΔt	0.954842	0.578344
E10	SYBR	OASL	Control	25.7991			1.0163	33923.6			0.972655	0.80478			1.00696	0.777366			0.968171	0.598739
E11	SYBR	OASL	Control	25.781			0.948246	35364.2			1.02811	0.761368			0.933033	0.725309			1.08172	0.566442
E12	SYBR	OASL	Control	25.617		P		0.000150419		P		0.000532932		P		0.0106415		P		0.00664737
F10	SYBR	OASL	OE-IGKC	25.0444
F11	SYBR	OASL	OE-IGKC	24.986
F12	SYBR	OASL	OE-IGKC	25.0736			Control	OE-IGKC			Control	OE-IGKC			Control	OE-IGKC
						JAK2	25.26	24.37		STAT1	21.59	20.72		STAT2	23.86	23.12
							25.2	24.35			21.51	20.66			23.85	23.16
A01	SYBR	JAK2	Control	25.2561			25.23	24.43			21.47	20.68			23.98	23.21
A02	SYBR	JAK2	Control	25.1991		Δt	7.56667	8.16		Δt	3.89667	4.51		Δt	6.16667	6.91
A03	SYBR	JAK2	Control	25.2348			7.50667	8.14			3.81667	4.45			6.15667	6.95
A04	SYBR	ACTB	Control	17.7274			7.53667	8.22			3.77667	4.47			6.28667	7
A05	SYBR	ACTB	Control	17.7241			7.53667				3.83				6.20333
A06	SYBR	ACTB	Control	17.6252		ΔΔt	0.03	0.623333		ΔΔt	0.0666667	0.68		ΔΔt	-0.0366667	0.706667
A07	SYBR	STAT1	Control	21.5874			-0.03	0.603333			-0.0133333	0.62			-0.0466667	0.746667
A08	SYBR	STAT1	Control	21.5102			0	0.683333			-0.0533333	0.64			0.0833333	0.796667
A09	SYBR	STAT1	Control	21.4655		2^-ΔΔt	0.97942	0.649169		2^-ΔΔt	0.954842	0.624165		2^-ΔΔt	1.02574	0.612734
A10	SYBR	STAT2	Control	23.8643			1.02101	0.658231			1.00928	0.650671			1.03288	0.595979
A11	SYBR	STAT2	Control	23.8547			1	0.622725			1.03766	0.641713			0.943874	0.575678
A12	SYBR	STAT2	Control	23.9753		P		2.71706e-05		P		0.00223992		P		0.00199739
B01	SYBR	JAK2	OE-IGKC	24.3743
B02	SYBR	JAK2	OE-IGKC	24.3492
B03	SYBR	JAK2	OE-IGKC	24.4325
B04	SYBR	ACTB	OE-IGKC	16.1959
B05	SYBR	ACTB	OE-IGKC	16.2075
B06	SYBR	ACTB	OE-IGKC	16.2218
B07	SYBR	STAT1	OE-IGKC	20.7212
B08	SYBR	STAT1	OE-IGKC	20.661
B09	SYBR	STAT1	OE-IGKC	20.6793
B10	SYBR	STAT2	OE-IGKC	23.1191
B11	SYBR	STAT2	OE-IGKC	23.1623
B12	SYBR	STAT2	OE-IGKC	23.2094

## Sheet: Fig 5G
Well	Fluor	Target	Sample	Cq		OVCAR3
A01	SYBR	ISG	siNC	24.42			siNC	siIGKC			siNC	siIGKC			siNC	siIGKC			siNC	siIGKC
A02	SYBR	ISG	siNC	24.45		IGKC	33.24	32.79		ISG	24.42	22.39		OAS1	26.86	25.05		OAS2	30.76	28.67
A03	SYBR	ISG	siNC	24.36			33.58	33.53			24.45	22.41			26.77	25.17			30.91	28.78
A04	SYBR	OAS1	siNC	26.86			33.28	32.6			24.36	22.44			26.76	25.15			30.93	28.61
A05	SYBR	OAS1	siNC	26.77		ΔCT	14.8467	15.8933		ΔCT	6.02667	5.49333		ΔCT	8.46667	8.15333		ΔCT	12.3667	11.7733
A06	SYBR	OAS1	siNC	26.76			15.1867	16.6333			6.05667	5.51333			8.37667	8.27333			12.5167	11.8833
A07	SYBR	OAS2	siNC	30.76			14.8867	15.7033			5.96667	5.54333			8.36667	8.25333			12.5367	11.7133
A08	SYBR	OAS2	siNC	30.91			14.9733				6.01667				8.40333				12.4733
A09	SYBR	OAS2	siNC	30.93		ΔΔCT	-0.126667	0.92		ΔΔCT	0.01	-0.523333		ΔΔCT	0.0633333	-0.25		ΔΔCT	-0.106667	-0.7
A10	SYBR	IGKC	siNC	33.24			0.213333	1.66			0.04	-0.503333			-0.0266667	-0.13			0.0433333	-0.59
A11	SYBR	IGKC	siNC	33.58			-0.0866667	0.73			-0.05	-0.473333			-0.0366667	-0.15			0.0633333	-0.76
A12	SYBR	IGKC	siNC	33.28		2^-ΔΔCT	1.09177	0.528509		2^-ΔΔCT	0.993092	1.43727		2^-ΔΔCT	0.95705	1.18921		2^-ΔΔCT	1.07674	1.6245
C01	SYBR	ISG	siIGKC	22.39			0.862542	0.316439			0.972655	1.41748			1.01866	1.09429			0.97041	1.50525
C02	SYBR	ISG	siIGKC	22.41			1.06191	0.602904			1.03526	1.38831			1.02574	1.10957			0.95705	1.69349
C03	SYBR	ISG	siIGKC	22.44		P		0.0102423		P		9.13736e-05		P		0.0268994		P		0.00139855
C04	SYBR	OAS1	siIGKC	25.05
C05	SYBR	OAS1	siIGKC	25.17			siNC	siIGKC			siNC	siIGKC			siNC	siIGKC
C06	SYBR	OAS1	siIGKC	25.15		IFIT2	27.2	25.16		IFIT3	26.19	24.4		OASL	30.61	28.91
C07	SYBR	OAS2	siIGKC	28.67			27.09	25.34			26.23	24.38			30.64	28.68
C08	SYBR	OAS2	siIGKC	28.78			27.22	25.07			26.03	24.35			30.51	28.7
C09	SYBR	OAS2	siIGKC	28.61		ΔCT	8.80667	8.26333		ΔCT	7.79667	7.50333		ΔCT	12.2167	12.0133
C10	SYBR	IGKC	siIGKC	32.79			8.69667	8.44333			7.83667	7.48333			12.2467	11.7833
C11	SYBR	IGKC	siIGKC	33.53			8.82667	8.17333			7.63667	7.45333			12.1167	11.8033
C12	SYBR	IGKC	siIGKC	32.6			8.77667				7.75667				12.1933
E01	SYBR	IFIT2	siNC	27.2		ΔΔCT	0.03	-0.513333		ΔΔCT	0.04	-0.253333		ΔΔCT	0.0233333	-0.18
E02	SYBR	IFIT2	siNC	27.09			-0.08	-0.333333			0.08	-0.273333			0.0533333	-0.41
E03	SYBR	IFIT2	siNC	27.22			0.05	-0.603333			-0.12	-0.303333			-0.0766667	-0.39
E04	SYBR	IFIT3	siNC	26.19		2^-ΔΔCT	0.97942	1.42734		2^-ΔΔCT	0.972655	1.19196		2^-ΔΔCT	0.983957	1.13288
E05	SYBR	IFIT3	siNC	26.23			1.05702	1.25992			0.946058	1.2086			0.963707	1.32869
E06	SYBR	IFIT3	siNC	26.03			0.965936	1.51922			1.08673	1.23399			1.05458	1.31039
E07	SYBR	OASL	siNC	30.61		P		0.0229716		P		0.031968		P		0.038176
E08	SYBR	OASL	siNC	30.64
E09	SYBR	OASL	siNC	30.51			siNC	siIGKC
E10	SYBR	ACTB	siNC	18.39		ACTB	18.39	16.86
E11	SYBR	ACTB	siNC	18.39			18.39	16.88
E12	SYBR	ACTB	siNC	18.4			18.4	16.95
G01	SYBR	IFIT2	siIGKC	25.16		mean Ct	18.3933	16.8967
G02	SYBR	IFIT2	siIGKC	25.34
G03	SYBR	IFIT2	siIGKC	25.07
G04	SYBR	IFIT3	siIGKC	24.4
G05	SYBR	IFIT3	siIGKC	24.38
G06	SYBR	IFIT3	siIGKC	24.35
G07	SYBR	OASL	siIGKC	28.91
G08	SYBR	OASL	siIGKC	28.68
G09	SYBR	OASL	siIGKC	28.7
G10	SYBR	ACTB	siIGKC	16.86
G11	SYBR	ACTB	siIGKC	16.88
G12	SYBR	ACTB	siIGKC	16.95

## Sheet: Fig 6C
Well	Fluor	Target	Sample	Cq					分组	Cq			mean Cq						Fold enrichment
E03	SYBR	IGKC CON	input	33.5827			HCC827	IGKC CON	input	33.58	34.14	33.13	33.6167
E04	SYBR	IGKC CON	RIP IgG	35.6733					RIP IgG	35.67	34.51	33.64	34.6067	0	1	1.06333	-0.0966667	-0.966667	0.478525	1.0693	1.95432
E05	SYBR	IGKC CON	RIP-HNRNPM	33.525					RIP-HNRNPM	33.53	33.44	34.34	33.77	-0.836667	1.78592	-1.07667	-1.16667	-0.266667	2.10916	2.24492	1.20303
E07	SYBR	IGKC OE	input	18.5863
E08	SYBR	IGKC OE	RIP-IgG	33.7078				IGKC OE	input	18.59	18.8	18.73	18.7067
E09	SYBR	IGKC OE	RIP-HNRNPM	25.6823					RIP-IgG	33.71	32.52	33.25	33.16	0	1	0.55	-0.64	0.09	0.68302	1.55833	0.939523
F03	SYBR	IGKC CON	input	34.1417					RIP-HNRNPM	25.68	25.55	25.65	25.6267	-7.53333	185.25	-7.48	-7.61	-7.51	178.527	195.361	182.278
F04	SYBR	IGKC CON	RIP IgG	34.5103
F05	SYBR	IGKC CON	RIP-HNRNPM	33.4362
F07	SYBR	IGKC OE	input	18.8024
F08	SYBR	IGKC OE	RIP-IgG	32.5231
F09	SYBR	IGKC OE	RIP-HNRNPM	25.5496
G03	SYBR	IGKC CON	input	33.1261
G04	SYBR	IGKC CON	RIP IgG	33.6406
G05	SYBR	IGKC CON	RIP-HNRNPM	34.3402
G07	SYBR	IGKC OE	input	18.7301
G08	SYBR	IGKC OE	RIP-IgG	33.2549
G09	SYBR	IGKC OE	RIP-HNRNPM	25.6547

## Sheet: Fig 6O
Well	Fluor	Target	Sample	Cq
C01	SYBR	STAT2	HC827 KC+V2 Control	19.5507			HC827 KC+V2 Control	HC827 KC+sgHNRMPM#2
C02	SYBR	STAT2	HC827 KC+V2 Control	19.4595		ACTB	16	16.26
C03	SYBR	STAT2	HC827 KC+V2 Control	19.4829			16.03	16.3
D01	SYBR	STAT2	HC827 KC+sgHNRMPM#2	19.1622			16	16.24
D02	SYBR	STAT2	HC827 KC+sgHNRMPM#2	19.0971			16.01	16.2667
D03	SYBR	STAT2	HC827 KC+sgHNRMPM#2	19.0715
G01	SYBR	ISG15	HC827 KC+V2 Control	27.2761			HC827 KC+V2 Control	HC827 KC+sgHNRMPM#2			HC827 KC+V2 Control	HC827 KC+sgHNRMPM#2			HC827 KC+V2 Control	HC827 KC+sgHNRMPM#2
G02	SYBR	ISG15	HC827 KC+V2 Control	27.3813		ISG15	27.28	26.7		OAS1	20.75	19.86		OASL	25.36	24.72
G03	SYBR	ISG15	HC827 KC+V2 Control	27.4038			27.38	26.66			20.78	20			25.42	24.72
G07	SYBR	OAS1	HC827 KC+V2 Control	20.7531			27.4	26.6			20.74	19.93			25.4	24.8
G08	SYBR	OAS1	HC827 KC+V2 Control	20.78		Δt	11.27	10.4333		Δt	4.74	3.59333		Δt	9.35	8.45333
G09	SYBR	OAS1	HC827 KC+V2 Control	20.7397			11.37	10.3933			4.77	3.73333			9.41	8.45333
G10	SYBR	STAT1	HC827 KC+V2 Control	24.2428			11.39	10.3333			4.73	3.66333			9.39	8.53333
G11	SYBR	STAT1	HC827 KC+V2 Control	24.3492			11.3433				4.74667				9.38333
G12	SYBR	STAT1	HC827 KC+V2 Control	24.3658		ΔΔt	-0.0733333	-0.91		ΔΔt	-0.00666667	-1.15333		ΔΔt	-0.0333333	-0.93
H01	SYBR	ISG15	HC827 KC+sgHNRMPM#2	26.7011			0.0266667	-0.95			0.0233333	-1.01333			0.0266667	-0.93
H02	SYBR	ISG15	HC827 KC+sgHNRMPM#2	26.6643			0.0466667	-1.01			-0.0166667	-1.08333			0.00666667	-0.85
H03	SYBR	ISG15	HC827 KC+sgHNRMPM#2	26.605		2^-ΔΔt	1.05214	1.87905		2^-ΔΔt	1.00463	2.22427		2^-ΔΔt	1.02337	1.90528
H07	SYBR	OAS1	HC827 KC+sgHNRMPM#2	19.8558			0.981686	1.93187			0.983957	2.01857			0.981686	1.90528
H08	SYBR	OAS1	HC827 KC+sgHNRMPM#2	20.0007			0.968171	2.01391			1.01162	2.11893			0.99539	1.8025
H09	SYBR	OAS1	HC827 KC+sgHNRMPM#2	19.9309		P		0.000103588		P		0.00238846		P		0.000505699
H10	SYBR	STAT1	HC827 KC+sgHNRMPM#2	24.0707
H11	SYBR	STAT1	HC827 KC+sgHNRMPM#2	24.0261
H12	SYBR	STAT1	HC827 KC+sgHNRMPM#2	24.1475
							HC827 KC+V2 Control	HC827 KC+sgHNRMPM#2			HC827 KC+V2 Control	HC827 KC+sgHNRMPM#2			HC827 KC+V2 Control	HC827 KC+sgHNRMPM#2
C04	SYBR	ACTB	HC827 KC+V2 Control	16.002		JAK2	22.69	22.48		STAT1	24.24	24.07		STAT2	19.55	19.16
C05	SYBR	ACTB	HC827 KC+V2 Control	16.0309			22.71	22.39			24.35	24.03			19.46	19.1
C06	SYBR	ACTB	HC827 KC+V2 Control	15.9996			22.52	22.51			24.37	24.15			19.48	19.07
D04	SYBR	ACTB	HC827 KC+sgHNRMPM#2	16.2609		Δt	6.68	6.21333		Δt	8.23	7.80333		Δt	3.54	2.89333
D05	SYBR	ACTB	HC827 KC+sgHNRMPM#2	16.2994			6.7	6.12333			8.34	7.76333			3.45	2.83333
D06	SYBR	ACTB	HC827 KC+sgHNRMPM#2	16.2354			6.51	6.24333			8.36	7.88333			3.47	2.80333
G01	SYBR	JAK2	HC827 KC+V2 Control	22.6878			6.63				8.31				3.48667
G02	SYBR	JAK2	HC827 KC+V2 Control	22.7101		ΔΔt	0.05	-0.416667		ΔΔt	-0.08	-0.506667		ΔΔt	0.0533333	-0.593333
G03	SYBR	JAK2	HC827 KC+V2 Control	22.517			0.07	-0.506667			0.03	-0.546667			-0.0366667	-0.653333
G07	SYBR	OASL	HC827 KC+V2 Control	25.3623			-0.12	-0.386667			0.05	-0.426667			-0.0166667	-0.683333
G08	SYBR	OASL	HC827 KC+V2 Control	25.4212		2^-ΔΔt	0.965936	1.33484		2^-ΔΔt	1.05702	1.42076		2^-ΔΔt	0.963707	1.50873
G09	SYBR	OASL	HC827 KC+V2 Control	25.3975			0.952638	1.42076			0.97942	1.46071			1.02574	1.5728
H01	SYBR	JAK2	HC827 KC+sgHNRMPM#2	22.476			1.08673	1.30737			0.965936	1.34412			1.01162	1.60585
H02	SYBR	JAK2	HC827 KC+sgHNRMPM#2	22.3887		P		0.00348418		P		0.000916246		P		0.000207365
H03	SYBR	JAK2	HC827 KC+sgHNRMPM#2	22.5086
H07	SYBR	OASL	HC827 KC+sgHNRMPM#2	24.7186
H08	SYBR	OASL	HC827 KC+sgHNRMPM#2	24.7204
H09	SYBR	OASL	HC827 KC+sgHNRMPM#2	24.8027

## Sheet: Fig 7A
Well	Fluor	Target	Sample	Cq
A02	SYBR	Actin	m-LN	18.1209
A03	SYBR	Actin	m-LN	18.1057
A04	SYBR	Actin	m-LN	18.1175
A05	SYBR	Actin	JC	18.9937
A06	SYBR	Actin	JC	18.5005
A07	SYBR	Actin	JC	18.5009
A08	SYBR	IGKC-1	m-LN	16.2783
A09	SYBR	IGKC-1	m-LN	16.3051
A10	SYBR	IGKC-1	m-LN	16.2465
B02	SYBR	Actin	TC-1	16.4794
B03	SYBR	Actin	TC-1	16.5163
B04	SYBR	Actin	TC-1	16.5054
B05	SYBR	Actin	KLN205	17.2981
B06	SYBR	Actin	KLN205	17.826
B07	SYBR	Actin	KLN205	17.2491
B08	SYBR	IGKC-1	TC-1	32.0527
B09	SYBR	IGKC-1	TC-1	31.8824
B10	SYBR	IGKC-1	TC-1	31.4594
B11	SYBR	Actin	CMT167	15.5101
C02	SYBR	Actin	ID8	16.8194
C03	SYBR	Actin	ID8	16.7578
C04	SYBR	Actin	ID8	16.8123
C05	SYBR	Actin	CMT93	16.3274
C06	SYBR	Actin	CMT93	15.7662
C07	SYBR	Actin	CMT93	16.0144
C08	SYBR	IGKC-1	ID8	32.116
C09	SYBR	IGKC-1	ID8	31.6545
C10	SYBR	IGKC-1	ID8	32.679
C11	SYBR	Actin	CMT167	15.3952
D02	SYBR	Actin	B16	18.0197
D03	SYBR	Actin	B16	18.1038
D04	SYBR	Actin	B16	18.2658
D05	SYBR	Actin	CMT64	15.1396
D06	SYBR	Actin	CMT64	15.1685
D07	SYBR	Actin	CMT64	15.1893
D08	SYBR	IGKC-1	B16	32.6086
D09	SYBR	IGKC-1	B16	31.8041
D10	SYBR	IGKC-1	B16	31.9669
D11	SYBR	Actin	CMT167	13.9729
E02	SYBR	Actin	MC38	16.0706
E03	SYBR	Actin	MC38	16.0477
E04	SYBR	Actin	MC38	16.0416
E05	SYBR	IGKC-1	JC	32.5147
E06	SYBR	IGKC-1	JC	31.708
E07	SYBR	IGKC-1	JC	32.0006
E08	SYBR	IGKC-1	MC38	31.8991
E09	SYBR	IGKC-1	MC38	31.381
E10	SYBR	IGKC-1	MC38	31.3957
E11	SYBR	IGKC-1	CMT167	31.1334
F02	SYBR	Actin	CT26	16.8952
F03	SYBR	Actin	CT26	16.9696
F04	SYBR	Actin	CT26	16.9299
F05	SYBR	IGKC-1	KLN205	33.2613
F06	SYBR	IGKC-1	KLN205	32.3423
F07	SYBR	IGKC-1	KLN205	31.3214
F08	SYBR	IGKC-1	CT26	35.1587
F09	SYBR	IGKC-1	CT26	32.1539
F10	SYBR	IGKC-1	CT26	33.0707
F11	SYBR	IGKC-1	CMT167	31.4951
G02	SYBR	Actin	4T1	16.8689
G03	SYBR	Actin	4T1	16.8784
G04	SYBR	Actin	4T1	16.8324
G05	SYBR	IGKC-1	CMT93	31.9574
G06	SYBR	IGKC-1	CMT93	31.96
G07	SYBR	IGKC-1	CMT93	31.7124
G08	SYBR	IGKC-1	4T1	32.335
G09	SYBR	IGKC-1	4T1	33.0039
G10	SYBR	IGKC-1	4T1	32.4794
G11	SYBR	IGKC-1	CMT167	32.0881
H02	SYBR	Actin	Hepa1-6	17.5049
H03	SYBR	Actin	Hepa1-6	17.4849
H04	SYBR	Actin	Hepa1-6	17.3462
H05	SYBR	IGKC-1	CMT64	31.4883
H06	SYBR	IGKC-1	CMT64	31.923
H07	SYBR	IGKC-1	CMT64	32.2253
H08	SYBR	IGKC-1	Hepa1-6	33.3765
H09	SYBR	IGKC-1	Hepa1-6	31.8529
H10	SYBR	IGKC-1	Hepa1-6	32.5557

## Sheet: Fig 7C
Well	Fluor	Target	Sample	Cq		4T1
A02	SYBR	Actin	Control	19.3358			Control	OE-IGKC
A03	SYBR	Actin	Control	19.0808		ACTB	19.34	19.84
A04	SYBR	Actin	Control	19.0599			19.08	19.79
B02	SYBR	Actin	OE-IGKC	19.8439			19.06	19.74
B03	SYBR	Actin	OE-IGKC	19.7879		mean	19.16	19.79
B04	SYBR	Actin	OE-IGKC	19.7389
C05	SYBR	OAS1b	Control	24.2492			Control	OE-IGKC			Control	OE-IGKC			Control	OE-IGKC
C06	SYBR	OAS1b	Control	24.2118		ISG15	20.68	22.79		OAS1b	24.25	25.4		OAS2	19.45	20.29
C07	SYBR	OAS1b	Control	24.2554			20.55	22.76			24.21	25.45			19.42	20.47
D05	SYBR	OAS1b	OE-IGKC	25.3991			20.47	22.8			24.26	25.39			19.34	20.44
D06	SYBR	OAS1b	OE-IGKC	25.4458		Δt	1.52	3		Δt	5.09	5.61		Δt	0.29	0.5
D07	SYBR	OAS1b	OE-IGKC	25.3896			1.39	2.97			5.05	5.66			0.26	0.68
E02	SYBR	ISG15	Control	20.6791			1.31	3.01			5.1	5.6			0.18	0.65
E03	SYBR	ISG15	Control	20.5515			1.40667				5.08				0.243333
E04	SYBR	ISG15	Control	20.469		ΔΔt	0.113333	1.59333		ΔΔt	0.01	0.53		ΔΔt	0.0466667	0.256667
E05	SYBR	IFIT3	Control	19.4888			-0.0166667	1.56333			-0.03	0.58			0.0166667	0.436667
E06	SYBR	IFIT3	Control	19.4852			-0.0966667	1.60333			0.02	0.52			-0.0633333	0.406667
E07	SYBR	IFIT3	Control	19.5234		2^-ΔΔt	0.92445	0.331405		2^-ΔΔt	0.993092	0.692555		2^-ΔΔt	0.968171	0.83702
E08	SYBR	OASL1	Control	26.7146			1.01162	0.338368			1.02101	0.668964			0.988514	0.73884
E09	SYBR	OASL1	Control	26.718			1.0693	0.329116			0.986233	0.697372			1.04488	0.754364
E10	SYBR	OASL1	Control	26.4767		P		0.00381299		P		2.94031e-05		P		0.00528841
F02	SYBR	ISG15	OE-IGKC	22.7856
F03	SYBR	ISG15	OE-IGKC	22.7563			Control	OE-IGKC			Control	OE-IGKC
F04	SYBR	ISG15	OE-IGKC	22.8035		IFIT3	19.49	20.54		OASL1	26.71	29.01
F05	SYBR	IFIT3	OE-IGKC	20.5433			19.49	20.5			26.72	29.08
F06	SYBR	IFIT3	OE-IGKC	20.4961			19.52	20.53			26.48	28.89
F07	SYBR	IFIT3	OE-IGKC	20.5313		Δt	0.33	0.75		Δt	7.55	9.22
F08	SYBR	OASL1	OE-IGKC	29.0112			0.33	0.71			7.56	9.29
F09	SYBR	OASL1	OE-IGKC	29.0767			0.36	0.74			7.32	9.1
F10	SYBR	OASL1	OE-IGKC	28.8884			0.34				7.47667
G08	SYBR	OAS2	Control	19.4485		ΔΔt	-0.01	0.41		ΔΔt	0.0733333	1.74333
G09	SYBR	OAS2	Control	19.4209			-0.01	0.37			0.0833333	1.81333
G10	SYBR	OAS2	Control	19.3448			0.02	0.4			-0.156667	1.62333
H08	SYBR	OAS2	OE-IGKC	20.29		2^-ΔΔt	1.00696	0.752623		2^-ΔΔt	0.950439	0.298679
H09	SYBR	OAS2	OE-IGKC	20.47			1.00696	0.773782			0.943874	0.284533
H10	SYBR	OAS2	OE-IGKC	20.44			0.986233	0.757858			1.11471	0.324585
						P		1.5093e-05		P		0.00476421

## Sheet: Fig 7D
Wells	Fluor	Target	sample	Cq
C01	SYBR	Actin	Control	11.19			Control	OE-IGKC			Control	OE-IGKC			Control	OE-IGKC
C02	SYBR	Actin	Control	14.76		ISG15	17.08	17.79		OAS1b	23.39	24.05		OAS2	28.62	29.64
C03	SYBR	Actin	Control	11.55			17.01	17.7			23.36	24.08			28.42	29.76
C10	SYBR	ISG15	Control	17.08			17.11	17.78			23.56	24.05			28.69	29.05
C11	SYBR	ISG15	Control	17.01		Δt	5.71	6.535		Δt	12.02	12.795		Δt	17.25	18.385
C12	SYBR	ISG15	Control	17.11			5.64	6.445			11.99	12.825			17.05	18.505
D01	SYBR	Actin	OE-IGKC	11.4			5.74	6.525			12.19	12.795			17.32	17.795
D02	SYBR	Actin	OE-IGKC	14.69			5.69667				12.0667				17.2067
D03	SYBR	Actin	OE-IGKC	11.11		ΔΔt	0.0133333	0.838333		ΔΔt	-0.0466667	0.728333		ΔΔt	0.0433333	1.17833
D10	SYBR	ISG15	OE-IGKC	17.79			-0.0566667	0.748333			-0.0766667	0.758333			-0.156667	1.29833
D11	SYBR	ISG15	OE-IGKC	17.7			0.0433333	0.828333			0.123333	0.728333			0.113333	0.588333
D12	SYBR	ISG15	OE-IGKC	17.78		2^-ΔΔt	0.990801	0.559289		2^-ΔΔt	1.03288	0.603601		2^-ΔΔt	0.97041	0.441862
G01	SYBR	OAS1	Control	23.39			1.04006	0.595291			1.05458	0.591179			1.11471	0.406596
G02	SYBR	OAS1	Control	23.36			0.97041	0.563179			0.918064	0.603601			0.92445	0.665111
G03	SYBR	OAS1	Control	23.56				0.000292138				0.0103462				0.0096305
G04	SYBR	OAS2	Control	28.62
G05	SYBR	OAS2	Control	28.42
G06	SYBR	OAS2	Control	28.69			Control	OE-IGKC			Control	OE-IGKC
G10	SYBR	IFIT3	Control	19.7		IFIT3	19.7	20.44		OASL	20.5558	21.8917
G11	SYBR	IFIT3	Control	19.75			19.75	20.59			20.6668	21.7335
G12	SYBR	IFIT3	Control	19.61			19.61	20.91			20.7065	21.7879
H01	SYBR	OAS1	OE-IGKC	24.05		Δt	8.33	9.185		Δt	9.18585	10.6367
H02	SYBR	OAS1	OE-IGKC	24.08			8.38	9.335			9.2968	10.4785
H03	SYBR	OAS1	OE-IGKC	24.05			8.24	9.655			9.33648	10.5329
H04	SYBR	OAS2	OE-IGKC	29.64			8.31667				9.27304
H05	SYBR	OAS2	OE-IGKC	29.76		ΔΔt	0.0133333	0.868333		ΔΔt	-0.0871941	1.36368
H06	SYBR	OAS2	OE-IGKC	29.05			0.0633333	1.01833			0.0237545	1.20544
H10	SYBR	IFIT3	OE-IGKC	20.44			-0.0766667	1.33833			0.0634397	1.25986
H11	SYBR	IFIT3	OE-IGKC	20.59		2^-ΔΔt	0.990801	0.547779		2^-ΔΔt	1.0623	0.388591
H12	SYBR	IFIT3	OE-IGKC	20.91			0.95705	0.493686			0.983669	0.433636
C01	SYBR	OASL1	Control	20.5558			1.05458	0.395477			0.95698	0.417585
C02	SYBR	OASL1	Control	20.6668				0.00127312				0.000819652
C03	SYBR	OASL1	Control	20.7065
D01	SYBR	OASL1	OE-IGKC	21.8917			TC-1 PCDH	TC-1 KC
D02	SYBR	OASL1	OE-IGKC	21.7335		ACTB	11.19	11.4
D03	SYBR	OASL1	OE-IGKC	21.7879
							11.55	11.11
							11.37	11.255

[truncated: 5 more sheets: Fig 7J, Fig S5E, Fig S5F, Fig S6C, Fig S6I]
