# Supplementary material
Source: Research Square preprint supplement (doi:10.21203/rs.3.rs-9600876/v1)
Supplement: Supplementary file 4 [file cf8598c0a3a97d0e483b9da2.docx]

**Table of Contents**

**Supplementary Figure 1-6**

**Supplementary Tables 1-3**

**Supplemental Figure 1-6**

**Figure S1.**

**
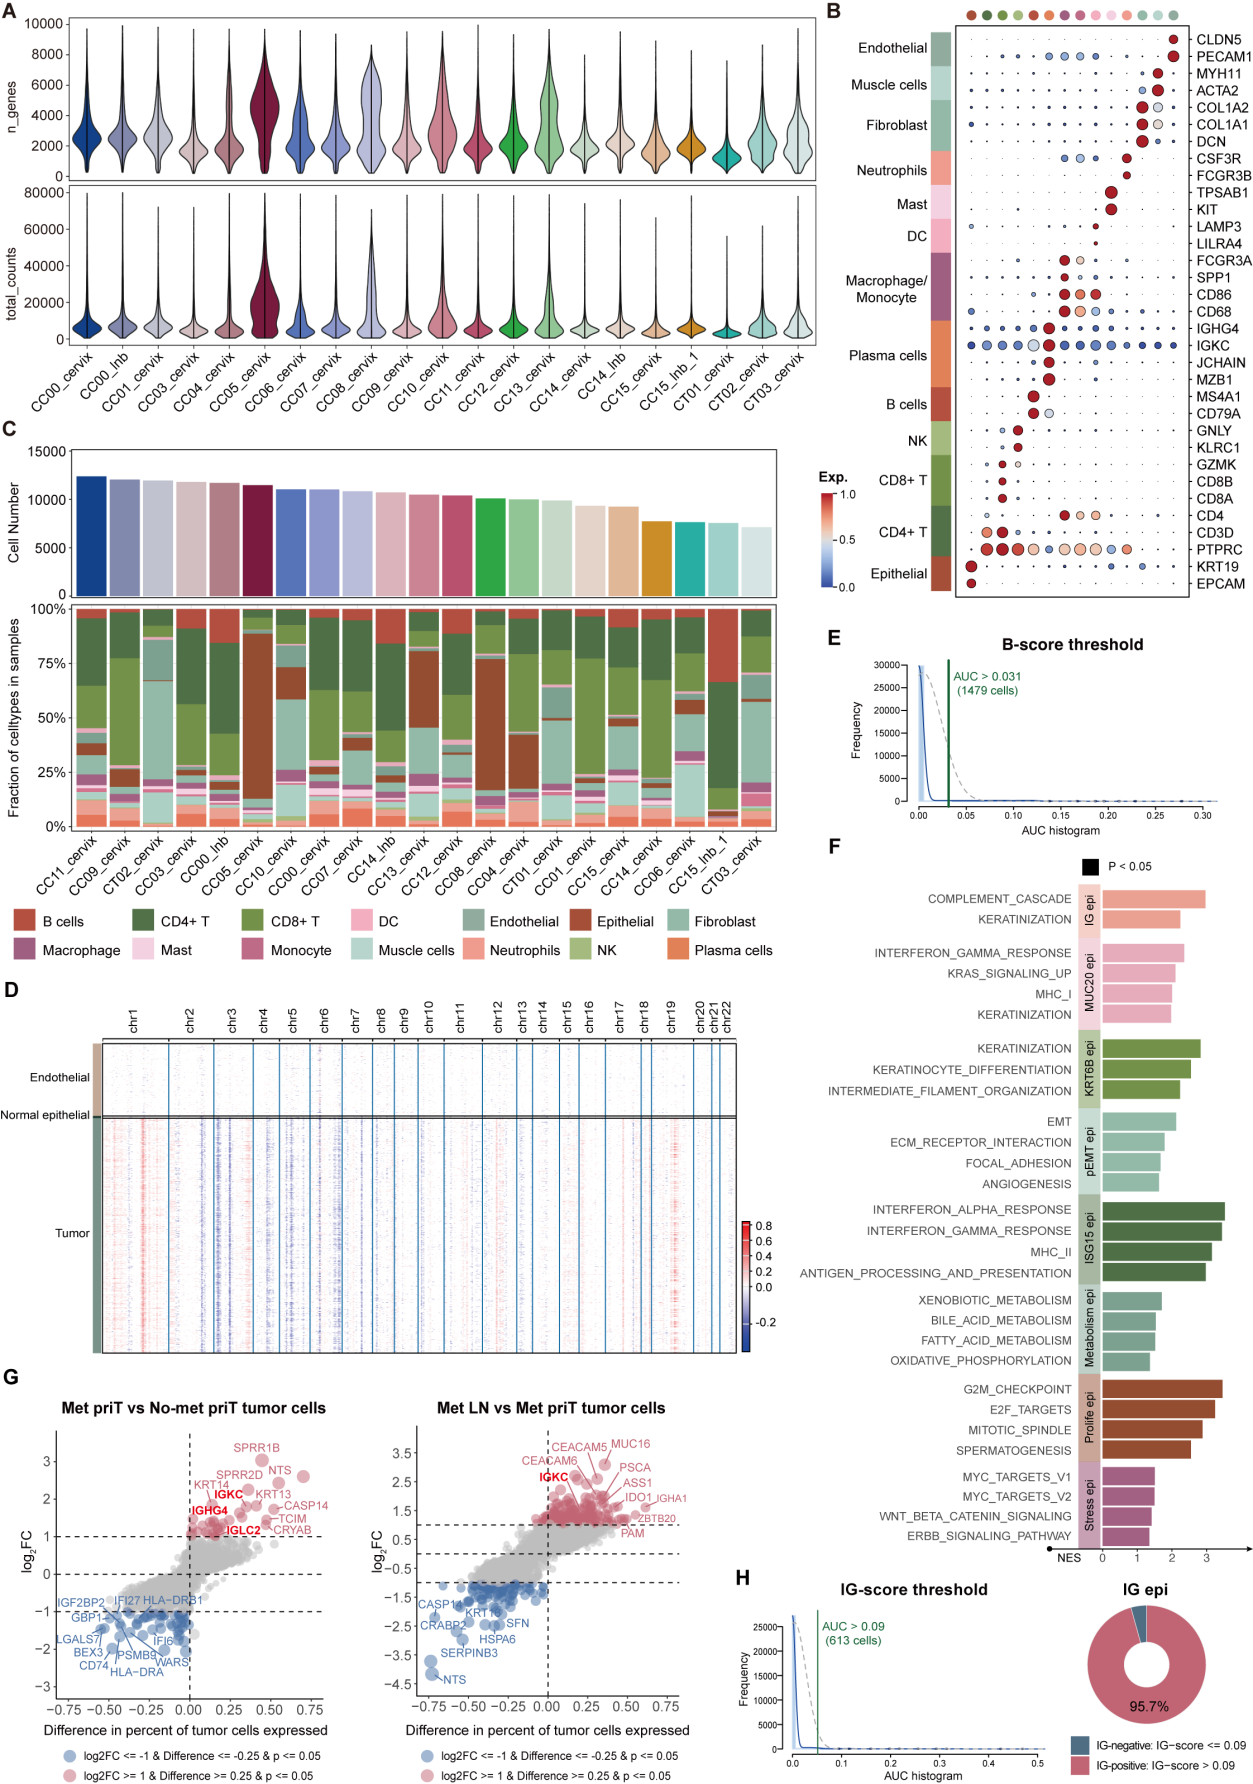
**

**Figure S1. Quality assessments for scRNA-seq data.** (**A**)Distributions of gene counts in per cell (top) and total gene counts in each sample (bottom). (**B**) Heatmap shows the expression of marker genes for sub-clusters. Key genes are indicated at the right.(**C**) Barplot of cell number in each sample (top) and fraction of sub-cluster in each sample (bottom). (**D**) Heatmap of CNV infers from scRNA-seq. InferCNV uses endothelial cells as control and the median expression of all epithelial cells. (**E**) The AUC histograms of epithelial cells and calculate likely thresholds for B-lineage and plasma-lineage geneset score. Epithelial cells defined as B-positive or plasma-positive cells cells depend on AUC b-score > 0.031 (1479 cells). (**F**) Significantly enriched gene signatures from HALLMARK and Gene Ontology in each tumor subcluster (solid bar plot, adjusted *p* < 0.05). Normalized enrichment score (NES) of enriched terms are derived from the clusterProfiler package GSEA. (**G**) Vlocano plot of upregulated and downregulated genes between tumor cells from different groups. Left: tumor cells from cervix primary tumors. Right: Tumor cells from paired lymph node and primary tumor. Significance is determined as an adjusted *p* ≤ 0.05 (two-sided Wilcoxon rank-sum test) & log2FC ≥ 1 & difference (subtraction between pct.1 and pct.2) ≥ 0.25 (pink dots), or adjusted *p* ≤ 0.05 & log2FC ≤ 1 & difference ≤ -0.25 (blue plots). Key genes are labelled. (**H**) The AUC histograms of tumor cells and calculate likely thresholds for immunoglobulin geneset score. Tumor cells define as IG-positive cells cells depend on AUC IG-score > 0.09 (613 cells). The pie chart show the percentage of IG-positive and -negative in IG epi.

**Figure S2**

**
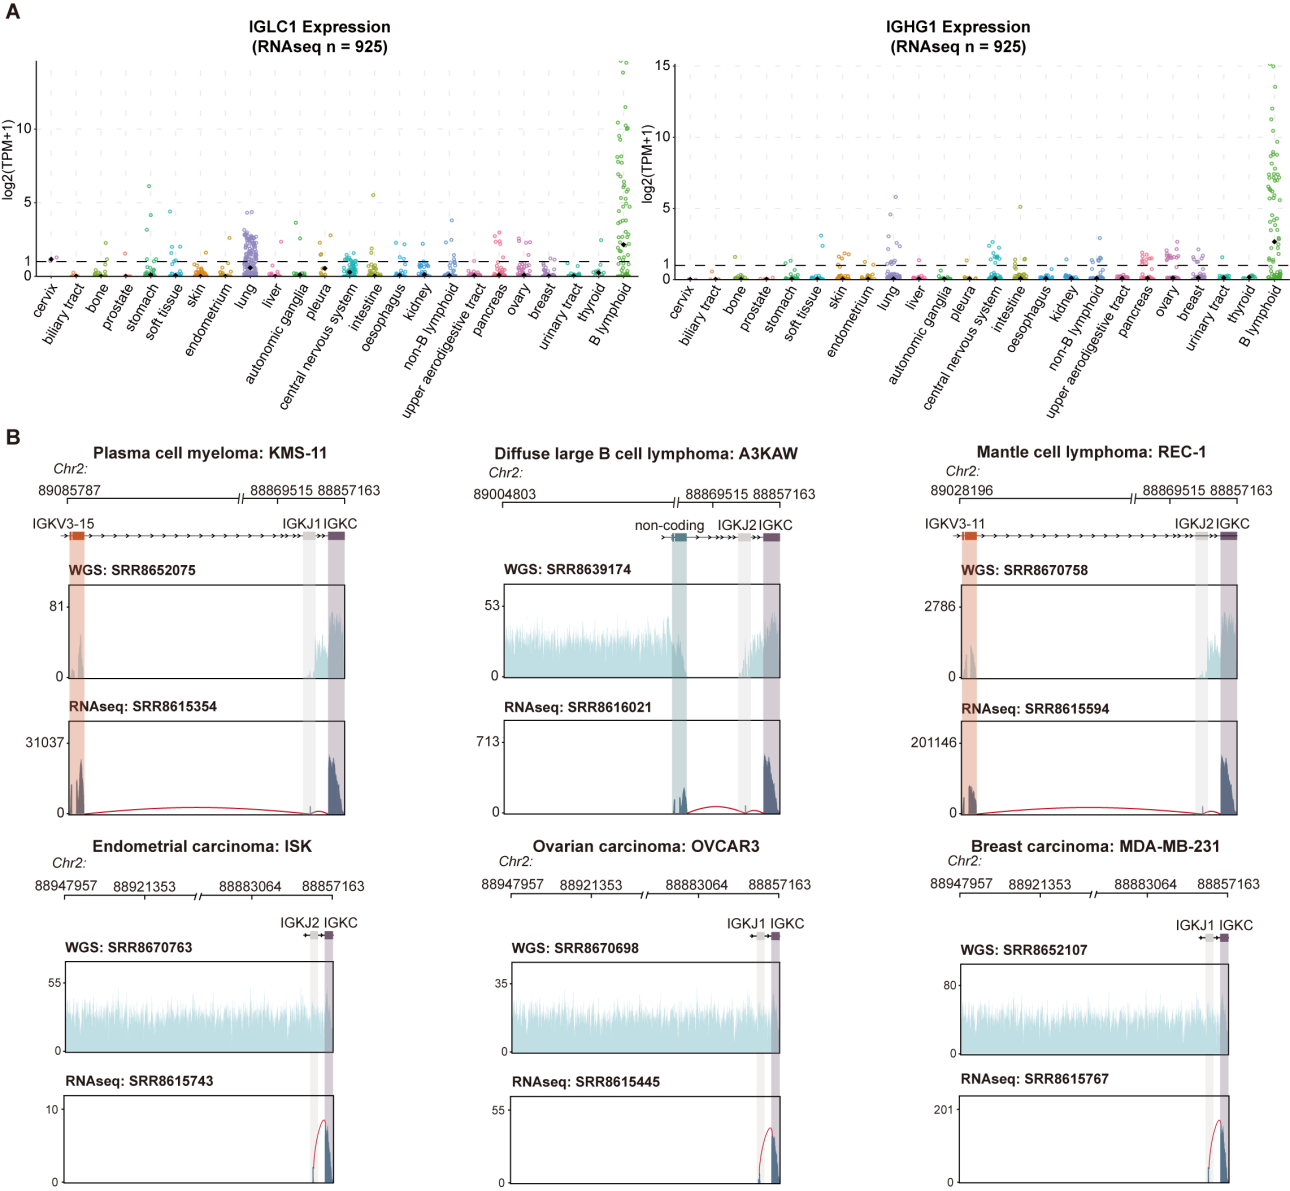
**

**Figure S2. Character of λ light region and heavy region immunoglobulin genes in CCLE RNA-seq data. (A)** Dot plot of immunoglobulin genes IGLC1 and IGHG1expression in CCLE. Median expressions in each cancer type are labelled. Line cutoff is set at log2(TPM+1) =1. (**B**) IGV visualization of B-cells-releated non-solid carcinoma cell lines (Plasma cell myeloma: KMS-11, diffuse large B cell lymphonma: A3KAW and mantle cell lymphoma: REC-1) and solid carcinoma cell lines (endometrial carcinoma: ISK, ovarian carcinoma: OVCAR3 and breast carcinoma: MDA-MB-231) immunoglobulin ĸ light region (chr2: 88,857,163 - 89,330,429) in paired WGS and RNA-seq. Models are showed above.

**Figure S3.**

**
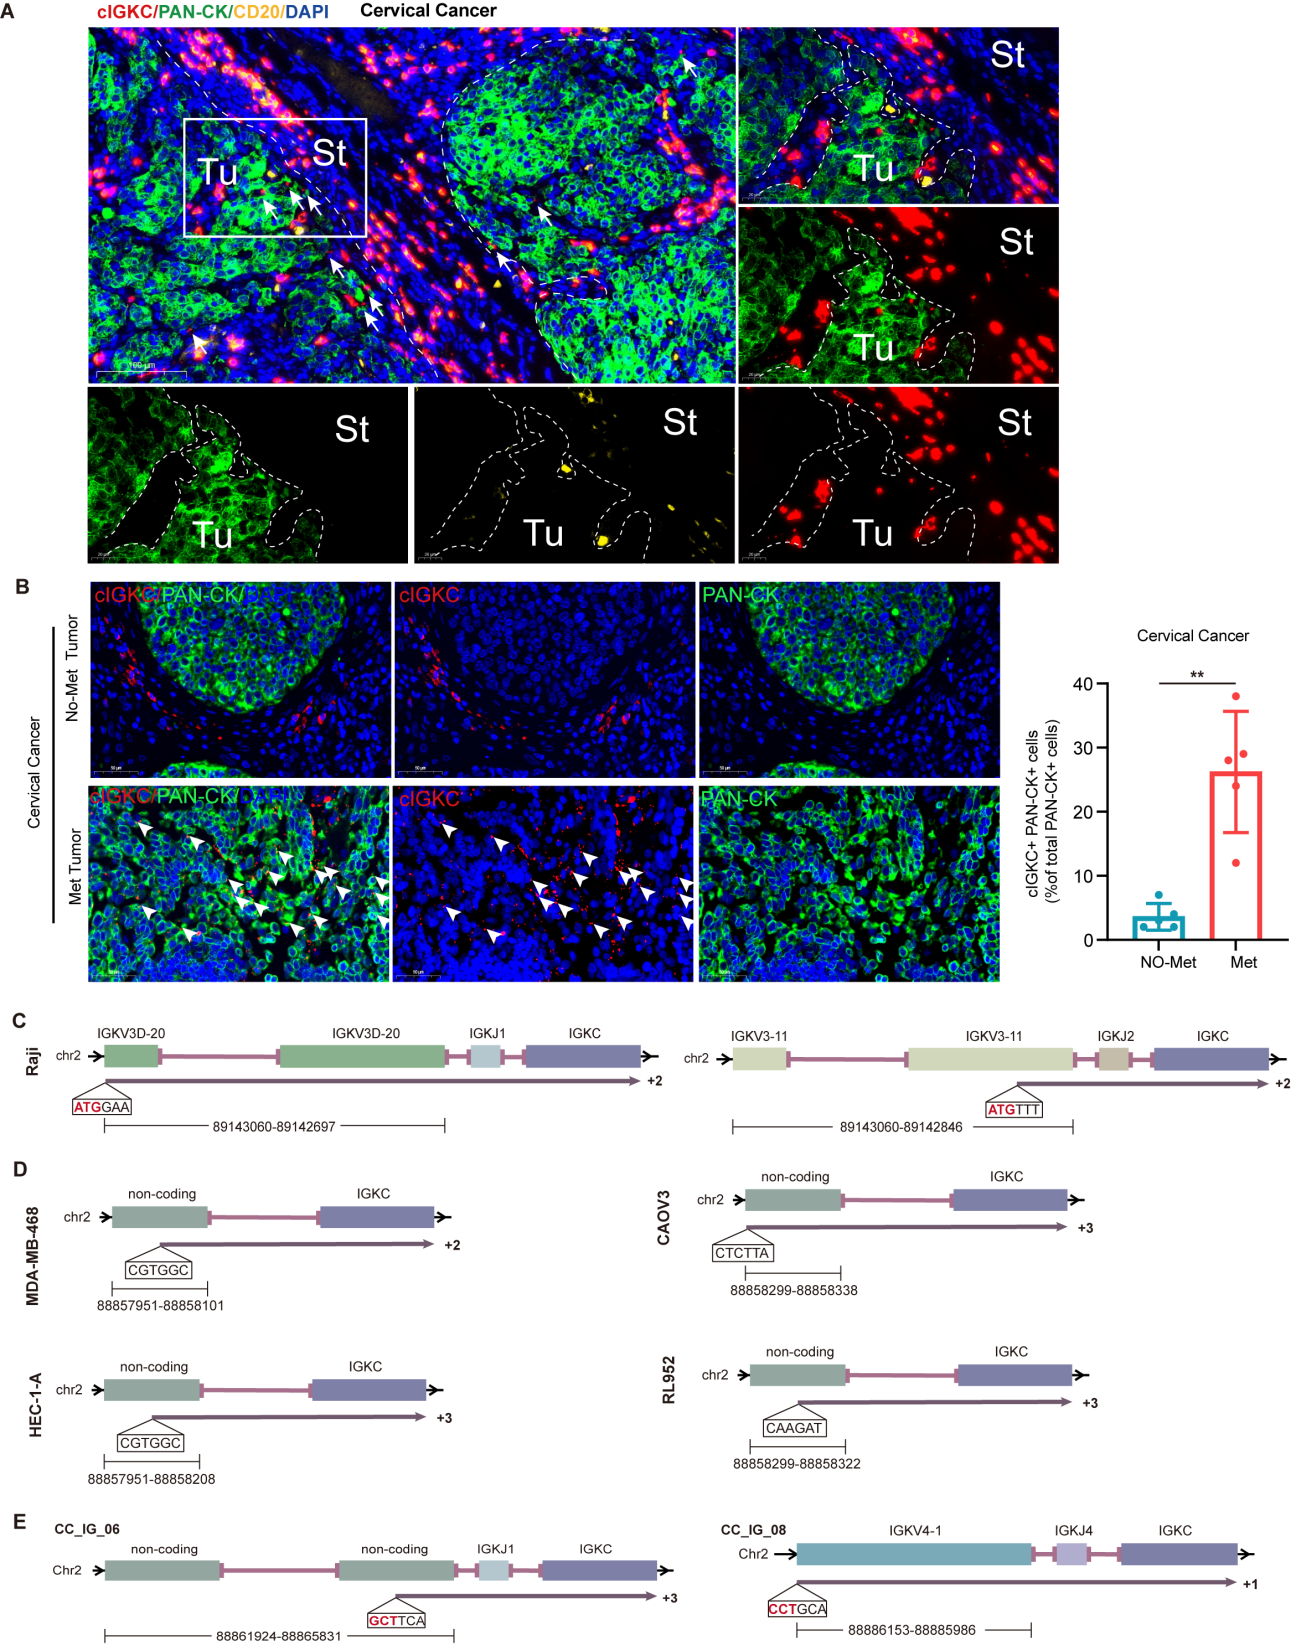
**

**Figure S3. Alternative splicing Pattern in Clinical Patient Samples and Cell lines. (A)** RNAscope detection of IGKC mRNA expression (red), PAN-CK antibodies (green) and CD20 (yellow) were simultaneously used to identify tumor cells in metastatic ovarian cancer. **(B)** RNAscope detection of IGKC expression (red), and PAN-CK antibodies were simultaneously used to identify tumor cells (green) in metastatic (n=5) and non-metastatic (n=5) ovarian cancer tissues. Representative images (left) and quantification (right) are shown.(**C**) Alternative splicing patterns in immunoglobulin ĸ light region in Raji cell lines. Start codon has been marked in red. 5’ RACE and Sanger Sequencing are used for the sequences in cell lines, which blat with GRCh38 in UCSC Genome Browser. (**D**) Alternative splicing patterns in immunoglobulin ĸ light region in MDA-MB-468, CAOVR3, HEC-1-A and RL95-2 cell lines. Start codon has been marked in red. 5’ RACE and Sanger Sequencing are used for the sequences in cell lines, which blat with GRCh38 in UCSC Genome Browser. (**E**)Alternative splicing patterns in immunoglobulin ĸ light region in primary cervical cancer cells. Start codon has been marked in red. 5’ RACE and Sanger Sequencing are used for the sequences in cell lines, which blat with GRCh38 in UCSC Genome Browser. Data are shown as mean±SEM. Statistical significance was determined using a two-tailed Students’t test; *p* < 0.05 was considered significant. ****p* < 0.001.

**Figure S4.**

**
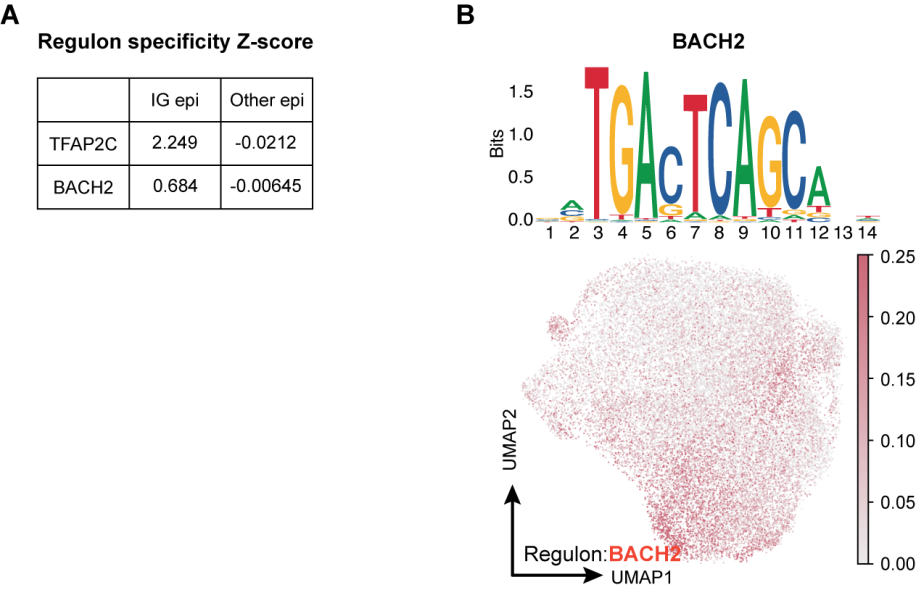
**

**Figure S4. TFs activity in Tumor.** (A) Regulon activity Z-score of TFAP2C and BACH2 in IG epi and other epi, which from figure 4A. (B) Binding motif of BACH2 (top) and UMAP map with binarized regulon activity scores (RAS) for regulon BACH2 (red dots) (bottom) in tumor.

**Figure S5.**


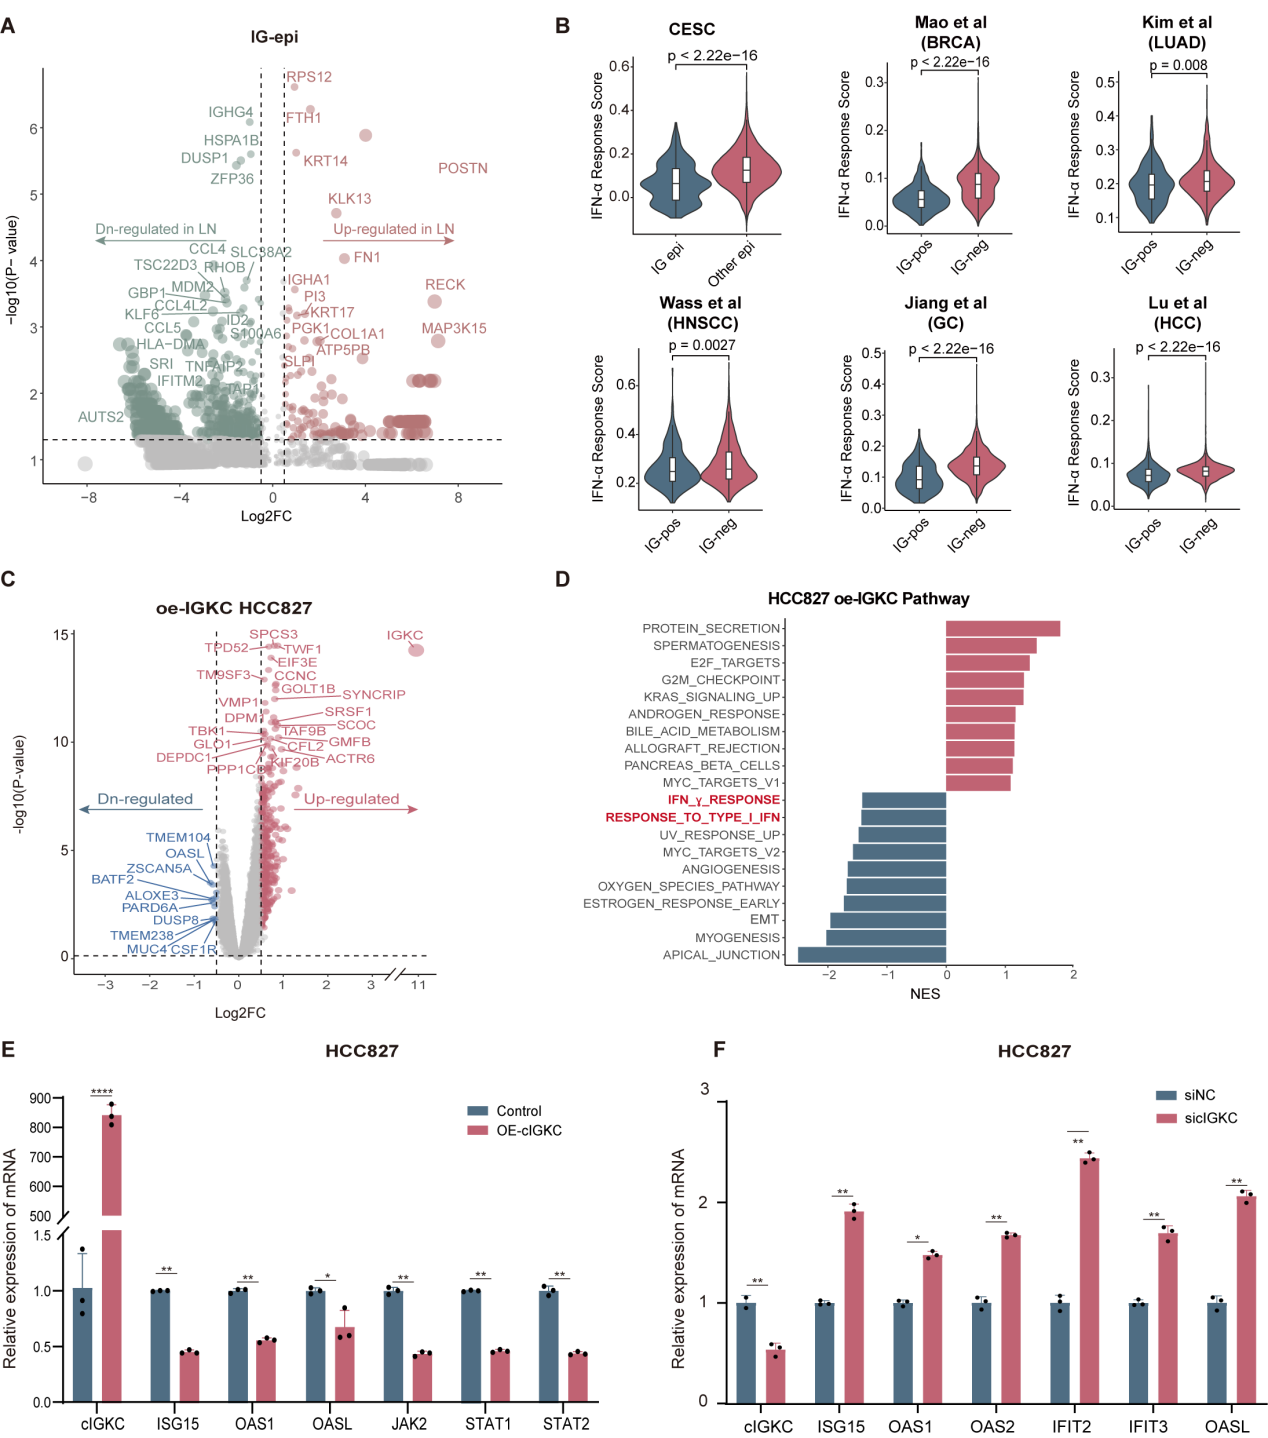


**Figure S5. Functional analysis of cIGKC in regulating IFN signaling.** (A) Vlocano plot of upregulated and downregulated genes in lymph node vs. primary lesion from IG epi. Significance is determined as an adjusted p < 0.05 (two-sided Wilcoxon rank-sum test), log2FC ≥ 0.5. Key genes are labelled. (B) Violin plots of IFNα score in-house tumor cells (CESC) and outer datasets are included. Likely therasholds of IG-pos and IG-neg are calculated separately in each outer datasets. The inner boxes display the interquartile range (IQR = Q3–Q1; the 25th (Q1) to the 75th percentiles (Q3)), with the centerline denoting the median. p value was calculated by two-sided Mann-Whitney U test. (C) Vlocano plot of upregulated and downregulated genes in HCC827 cell line with or without OE-IGKC. Significance is determined as an adjusted p < 0.05 (two-sided Wilcoxon rank-sum test), log2FC ≥ 1. Key genes are labelled. (D) Barplot of top enrich terms from HALLMARK and Gene Ontology using DEGs of HCC827 cell line RNA-seq with or without OE-IGKC. Normalized enrichment score (NES) of enriched terms are derived from the clusterProfiler package GSEA. (E) RT–PCR analysis of IFNγ response pathway genes in HCC827 cells overexpressing IGKC. (F) RT–PCR analysis of IFNγ response pathway genes after siIGKC in HCC827 cells.Data represent mean ± SEM; *p < 0.05, **p < 0.01.

**Figure S6.**

**
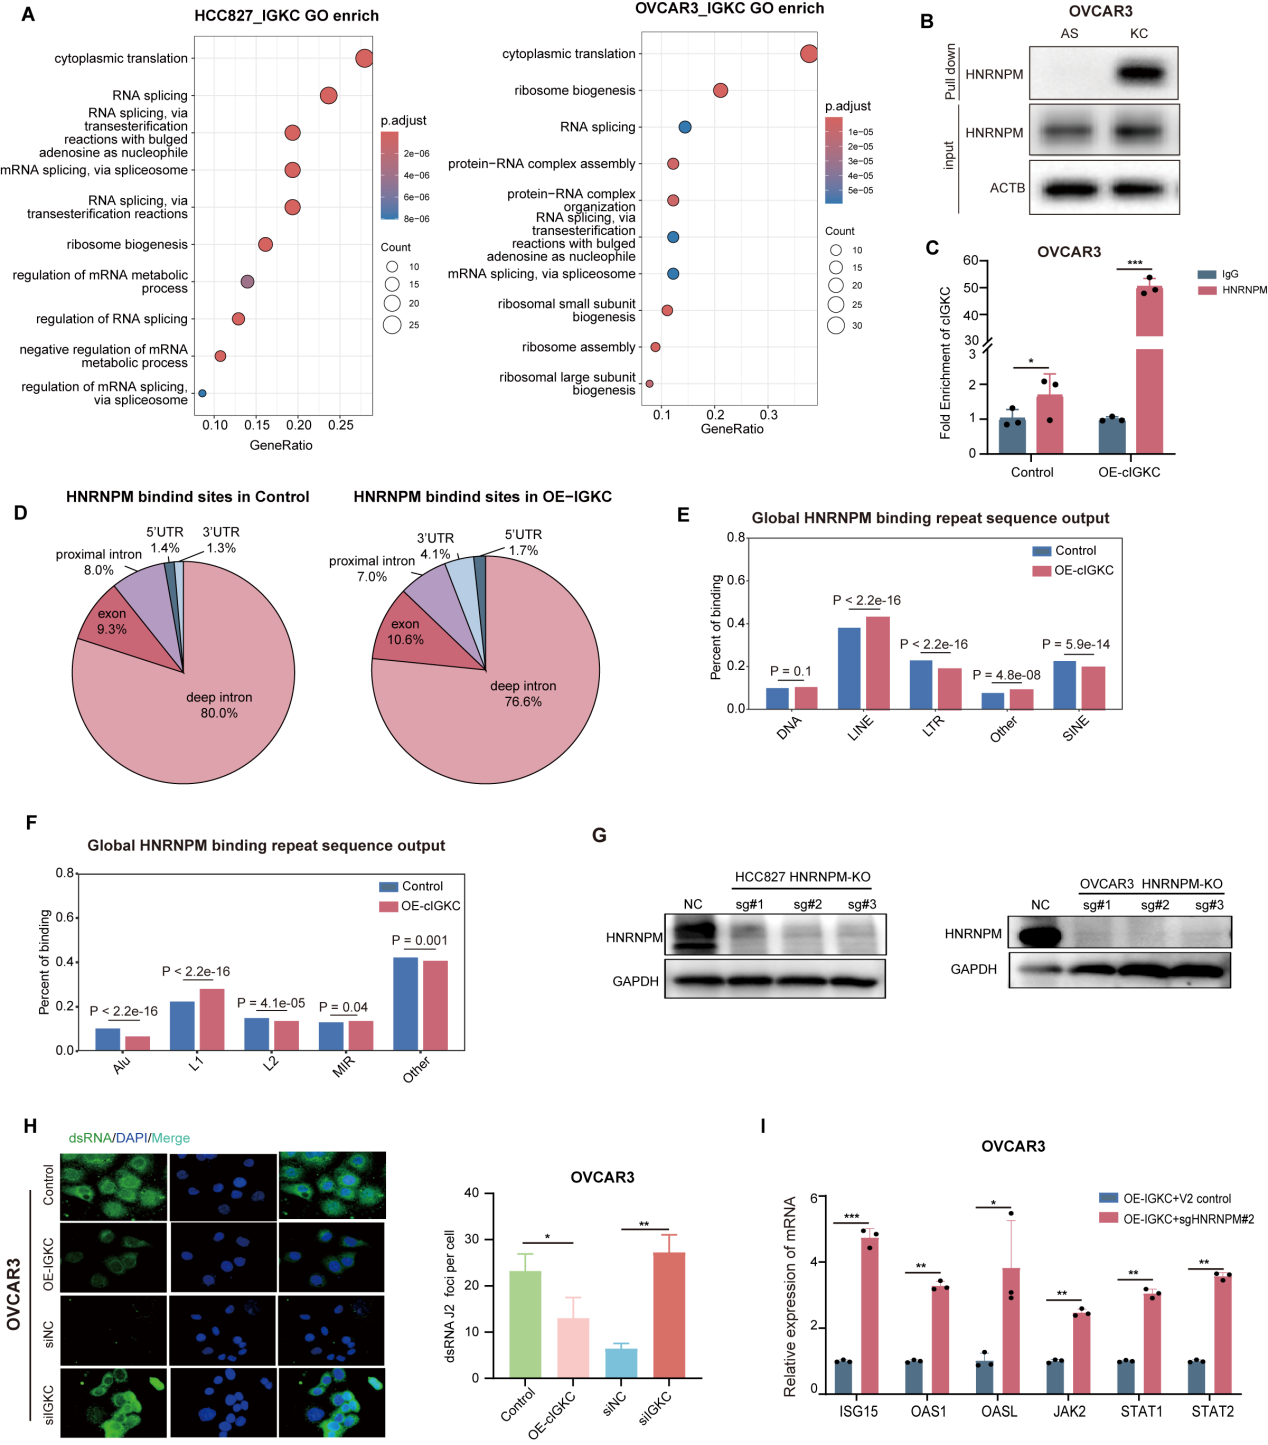
**

**Figure S6. IGKC interacts with hnRNPM to suppress dsRNA formation and IFNγ response signaling. (A)** GO biological categories significantly (p.adjust < 0.05) enriched from HCC827 OE-IGKC cell and OVCAR3 si-IGKC cell RNA-seq.**(B)** RNA pull-down assay detecting the interaction between cIGKC and hnRNPM in OVCAR3 cell line. **(C)** RNA immunoprecipitation showing enhanced cIGKC and hnRNPM binding after IGKC overexpression in OVCAR3 cell line. (**D**) Genomic distribution of deep intron, proximal intron, exon, 3’UTR and 5’UTR binding sites in OE-IGKC and control hnRNPM eCLIP-seq. (**E and F**) Bar plot shows percentage of repeats elements bound by hnRNPM globally. *P* values are calculated with Chi-Square Test. Bar plot shows percentage of LINE subtypes bound by hnRNPM globally. P values are calculated with Chi-Square Test. **(G)** Western blot analysis confirming hnRNPM knockdown efficiency in HCC827 and OVCAR3 cell lines. **(H)** Immunofluorescence staining with dsRNA (J2) antibody detecting reduced intracellular dsRNA levels upon cIGKC knockdown in HCC827 cells. **(I)** RT–PCR analysis showing recovery of IFNγ signaling pathway gene expression after hnRNPM knockdown in cIGKC-overexpressing OVCAR3 cell line. Data represent mean ± SEM; **p* < 0.05, ***p* < 0.01.

**Supplementary Tables 1-3**

**Table S1: Patients clinical information**

| **Patient** | **Diagnosis** | **Histology** | **Age** | **Status** | **Metastasis** | **Stage** |
| --- | --- | --- | --- | --- | --- | --- |
| CC01 | cervical cancer | squamous | 40 | naïve | Y | IIIC1p |
| CC02 | cervical cancer | squamous | 52 | naïve | Y | IIIA |
| CC03 | cervical cancer | squamous | 70 | naïve | N | IIA1 |
| CC04 | cervical cancer | squamous | 71 | naïve | N | IB2 |
| CC05 | cervical cancer | squamous | 53 | naïve | N | IIA1 |
| CC06 | cervical cancer | squamous | 52 | naïve | N | IIA2 |
| CC07 | cervical cancer | squamous | 64 | naïve | N | IIA1 |
| CC08 | cervical cancer | squamous | 42 | naïve | N | IB2 |
| CC09 | cervical cancer | squamous | 66 | naïve | N | IIA1 |
| CC10 | cervical cancer | squamous | 47 | naïve | N | IIA1 |
| CC11 | cervical cancer | squamous | 63 | naïve | N | IIA1 |
| CC12 | cervical cancer | squamous | 57 | naïve | Y | IIIC1p |
| CC13 | cervical cancer | squamous | 54 | naïve | Y | IIIC1p |
| CC14 | cervical cancer | squamous | 52 | naïve | Y | IIIC |
| CC15 | cervical cancer | squamous | 39 | naïve | Y | IIIC1 |
| HD01 | Hysteromyoma | NA | 56 | naïve | N | NA |
| HD02 | Hysteromyoma | NA | 45 | naïve | N | NA |
| HD03 | Hysteromyoma | NA | 50 | naïve | N | NA |

**Table S2: Information about cell lines used in this paper**

| **Cell lines** | **Species** | **Gender Culture Media** | **Source** | **RRID** |
| --- | --- | --- | --- | --- |
| HEK293 | Human Embryonic Kidney Cells | DMEM+10%FBS | ATCC | CVCL_0045 |
| Ishikawa | Humanendometrial carcinoma cell lines | DMEM/F12+10%FBS | ATCC | CVCL_2529 |
| HEC-1-A | Human endometrial carcinoma cell lines | McCoy’s 5A+10%FBS | ATCC | CVCL_0293 |
| RL95-2 | Human endometrial carcinoma cell lines | DM/F12+10%FBS | ATCC | CVCL_0505 |
| MDA-MB-231 | Human breast cancer cell lines | L-15+10%FBS | MDACC characterized Cell line Core | CVCL_0062 |
| MDA-MB-468 | Human breast cancer cell lines | L-15+10%FBS | MDACC characterized Cell line Core | CVCL_0419 |
| BT474 | Human breast cancer cell lines | RPMI-1640+10%FBS | MDACC characterized Cell line Core | CVCL_0179 |
| BXPC3 | Human breast cancer cell lines | RPMI-1640+10% FBS | MDACC characterized Cell line Core | CVCL_0186 |
| HCC827 | Human non-small cell lung cancer (NSCLC) cell lines | RPMI-1640+10% FBS | MDACC characterized Cell line Core | CVCL_2063 |
| CAOV3 | Human ovarian cancer cell lines | DMEM+10%FBS | MDACC characterized Cell line Core | CVCL_0201 |
| OVCAR3 | Human ovarian cancer cell lines | RPMI-1640+20%FBS | MDACC characterized Cell line Core | CVCL_0465 |
| TC-YIK | Human cervical small cell carcinoma cell lines | RPMI-1640+10% FBS | ATCC | CVCL_1737 |
| TC-1 | Mouse lung epithelial cells of C57BL/C | DMEM+10%FBS | China Center for Type Culture Collection | CVCL_4699 |
| ID8 | Mouse ovarian cancer cell line of C57BL/C | DMEM+10%FBS | China Center for Type Culture Collection | CVCL_IU14 |
| Hepa 1-6 | Mouse hepatocellular carcinoma cell line of C57BL/C | DMEM+10%FBS | China Center for Type Culture Collection | CVCL_0327 |
| JC | Mouse mammary carcinoma cell line of BALB/c | RPMI-1640+10%FBS | ATCC | CVCL_3530 |
| KLN 205 | Mouse squamous cell carcinoma cell line of DBA/2 | DMEM+10%FBS | China Center for Type Culture Collection | CVCL_3533 |
| CMT-93 | Mouse rectal carcinoma cell line of C57BL/C | DMEM+10%FBS | ATCC | CVCL_1986 |
| CMT64 | Mouse lung carcinoma cell line of C57BL/ICR | DMEM+10%FBS | ECACC | CVCL_2406 |
| CMT167 | Mouse lung adenocarcinoma cell line of C57BL/C | DMEM+10%FBS | ECACC | CVCL_2405 |
| B16 | Mouse melanoma cell line of C57BL/C | DMEM+10%FBS | China Center for Type Culture Collection | CVCL_F936 |
| CT26 | Mouse colon carcinoma cell line of BALB/c | DMEM+10%FBS | China Center for Type Culture Collection | CVCL_7254 |
| MC38 | Mouse colon adenocarcinoma cell line of C57BL/6 | DMEM+10%FBS | China Center for Type Culture Collection | CVCL_B288 |
| 4T1 | Mouse mammary carcinoma cell line of BALB/c | DMEM+10%FBS | China Center for Type Culture Collection | CVCL_0125 |

**Table S3: Information of Oligonucleotides used in this paper**

| **Purpose** | **Species** | **Name** | **Sequence** |
| --- | --- | --- | --- |
| qRT-PCR | human | IGKC-Forward | GAACTGTGGCTGCACCAT |
|  | human | IGKC-Reverse | GGGAGTTACCCGATTGGA |
|  | human | JAK2-Forward | TCTGGGGAGTATGTTGCAGAA |
|  | human | JAK2-Reverse | AGACATGGTTGGGTGGATACC |
|  | human | STAT1-Forward | CAATGGAACTTGATGGCCCTA |
|  | human | STAT1-Reverse | TTCTACAGAGCCCACTATCCG |
|  | human | STAT2-Forward | GAGCCAGCAACATGAGATTGA |
|  | human | STAT2-Reverse | GCCTGGATCTTATATCGGAAGCA |
|  | human | IRF1-Forward | ATGCCCATCACTCGGATGC |
|  | human | IRF1-Reverse | CCCTGCTTTGTATCGGCCTG |
|  | human | IRF3-Forward | AGAGGCTCGTGATGGTCAAG |
|  | human | IRF3-Reverse | AGGTCCACAGTATTCTCCAGG |
|  | human | IRF7-Forward | GCTGGACGTGACCATCATGTA |
|  | human | IRF7-Reverse | GGGCCGTATAGGAACGTGC |
|  | human | IRF9-Forward | GCCCTACAAGGTGTATCAGTTG |
|  | human | IRF9-Reverse | TGCTGTCGCTTTGATGGTACT |
|  | human | ISG15-Forward | CGCAGATCACCCAGAAGATCG |
|  | human | ISG15-Reverse | TTCGTCGCATTTGTCCACCA |
|  | human | OAS1-Forward | AGTTGACTGGCGGCTATAAAC |
|  | human | OAS1-Reverse | GTGCTTGACTAGGCGGATGAG |
|  | human | OAS2-Forward | AGGTGGCTCCTATGGACGG |
|  | human | OAS2-Reverse | TTTATCGAGGATGTCACGTTGG |
|  | human | IFIT2-Forward | AAGCACCTCAAAGGGCAAAAC |
|  | human | IFIT2-Reverse | TCGGCCCATGTGATAGTAGAC |
|  | human | IFIT3-Forward | TCAGAAGTCTAGTCACTTGGGG |
|  | human | IFIT3-Reverse | ACACCTTCGCCCTTTCATTTC |
|  | human | OASL-Forward | CCATTGTGCCTGCCTACAGAG |
|  | human | OASL-Reverse | CTTCAGCTTAGTTGGCCGATG |
|  | human | TFAP2C-Forward | CTGTTGCTGCACGATCAGACA |
|  | human | TFAP2C-Reverse | CTCAGTGGGGTTCATTACGGC |
|  | human | HNRNPM-Forward | GCGGCGACGGAGATCAAAA |
|  | human | HNRNPM-Reverse | CTCATTCTGAGCAGGTCGTTC |
|  | human | G3BP2-Forward | GTAGGGCGGGAGTTTGTGAG |
|  | human | G3BP2-Reverse | CTGGGGCTTTCCACTAGCATC |
|  | human | MZB1-Forward | GCTGTGGCTTACCAGATGT |
|  | human | MZB1-Reverse | TGTCCTGGAGAGCCTGGTAG |
|  | human | βactin-Forward | CATGTACGTTGCTATCCAGGC |
|  | human | βactin-Reverse | CTCCTTAATGTCACGCACGAT |
|  | human | GAPDH-Forward | GGAGCGAGATCCCTCCAAAAT |
|  | human | GAPDH-Reverse | GGCTGTTGTCATACTTCTCATGG |
|  | mouse | IGKC-Forward-1 | CCACCATCCAGTGAGCAGTT |
|  | mouse | IGKC-Reverse-1 | TCGTCCTTGGTCAACGTGAG |
|  | mouse | IGKC-Forward-2 | CCACCATCCAGTGAGCAGTTA |
|  | mouse | IGKC-Reverse-2 | CCAACTGTTCAGGACGCCAT |
|  | mouse | JAK2-Forward | GGAATGGCCTGCCTTACAATG |
|  | mouse | JAK2-Reverse | TGGCTCTATCTGCTTCACAGAAT |
|  | mouse | STAT1-Forward | TCACAGTGGTTCGAGCTTCAG |
|  | mouse | STAT1-Reverse | CGAGACATCATAGGCAGCGTG |
|  | mouse | STAT2-Forward | GTTACACCAGGTCTACTCACAGA |
|  | mouse | STAT2-Reverse | TGGTCTTCAATCCAGGTAGCC |
|  | mouse | IRF1-Forward | ATGCCAATCACTCGAATGCG |
|  | mouse | IRF1-Reverse | CCTGCTTTGTATCGGCCTGT |
|  | mouse | IRF3-Forward | GAGAGCCGAACGAGGTTCAG |
|  | mouse | IRF3-Reverse | CTTCCAGGTTGACACGTCCG |
|  | mouse | IRF7-Forward | GCGTACCCTGGAAGCATTTC |
|  | mouse | IRF7-Reverse | GCACAGCGGAAGTTGGTCT |
|  | mouse | IRF9-Forward | CCTCAGGCAAAGTACGCTG |
|  | mouse | IRF9-Reverse | GGGGTGTCCTATGTCCCCA |
|  | mouse | ISG15-Forward | GGTGTCCGTGACTAACTCCAT |
|  | mouse | ISG15-Reverse | CTGTACCACTAGCATCACTGTG |
|  | mouse | OAS1b-Forward | GGGCCTCTAAAGGGGTCAAG |
|  | mouse | OAS1b-Reverse | TCAAACTTCACTCCACAACGTC |
|  | mouse | OAS2-Forward | TTGAAGAGGAATACATGCGGAAG |
|  | mouse | OAS2-Reverse | GGGTCTGCATTACTGGCACTT |
|  | mouse | IFIT2-Forward | GGAGAGCAATCTGCGACAG |
|  | mouse | IFIT2-Reverse | GCTGCCTCATTTAGACCTCTG |
|  | mouse | IFIT3-Forward | CCTACATAAAGCACCTAGATGGC |
|  | mouse | IFIT3-Reverse | ATGTGATAGTAGATCCAGGCGT |
|  | mouse | OASL1-Forward | TGCTCAAGGTACTCAAGGTAGG |
|  | mouse | OASL1-Reverse | TGGGTACTCTGTTAGTCACACTC |
|  | mouse | OASL2-Forward | TTGTGCGGAGGATCAGGTACT |
|  | mouse | OASL2-Reverse | TGATGGTGTCGCAGTCTTTGA |
|  | mouse | βactin-Forward | GGCTGTATTCCCCTCCATCG |
|  | mouse | βactin-Reverse | CCAGTTGGTAACAATGCCATGT |
|  | mouse | GAPDH-Forward | CGACTTCAACAGCAACTCCCACTCTTCC |
|  | mouse | GAPDH-Reverse | TGGGTGGTCCAGGGTTTCTTACTCCTT |
| 5'RACE | human | H-IGKC-5‘RACE-1 | CTCCCCTGTTGAAGCTCTTTGTGACGGG |
|  | human | H-IGKC-5’RACE-2 | TGACGGGCGAGCTCAGGCCCTGAT |
|  | human | H-IGKC-5‘RACE-3 | GGGTGACTTCGCAGGCGTAGACTTTGTG |
|  | mouse | M-IGKC-5’RACE-1 | GCACACGACTGAGGCACCTCCAGATGTT |
|  | mouse | M-IGKC-5‘RACE-2 | CAGGACGCCATTTTGTCGTTCACTGCCA |
|  | mouse | M-IGKC-5’RACE-3 | GGTGCTGCTCATGCTGTAGGTGCTGTCT |
|  | mouse | M-IGKC-5‘RACE-4 | CGTCCTTGGTCAACGTGAGGGTGCTG |
| siRNA | human | siIGKC-1 | CCGTCACAAAGAGCTTCAA |
|  | human | siIGKC-2 | GCCTGCTGAATAACTTCTA |
|  | human | siIGKC-3 | GCACCCTGACGCTGAGCAA |
| sgRNA | human | sgHNRNPM-1 | CACCGATTATCCATGCATTACAGGC |
|  | human | sgHNRNPM-2 | CACCGGCCACGGCATGGATCGCGT |
|  | human | sgHNRNPM-3 | CACCGGTGGTGGTATGGAAAACAT |
