# Supplementary material
Source: Research Square preprint supplement (doi:10.21203/rs.3.rs-9600876/v1)

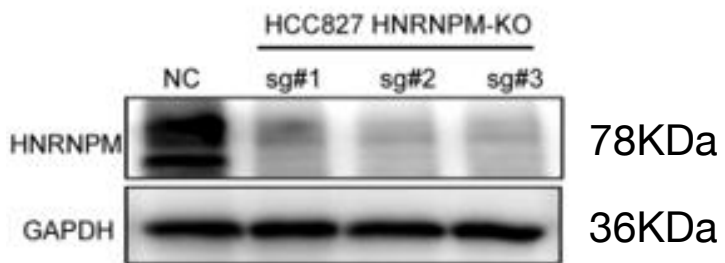

### HNRHPM

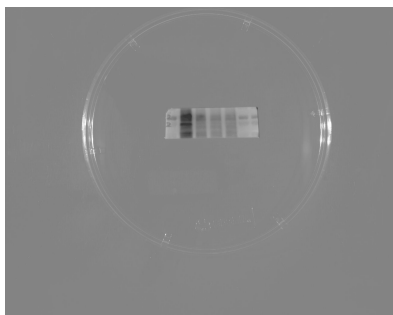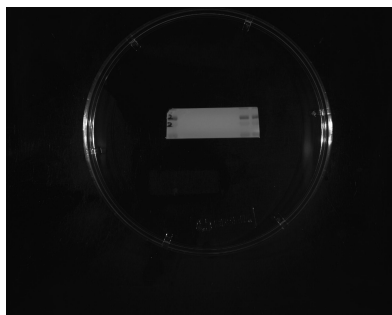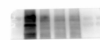

### GAPDH

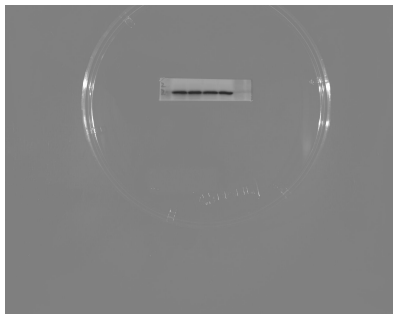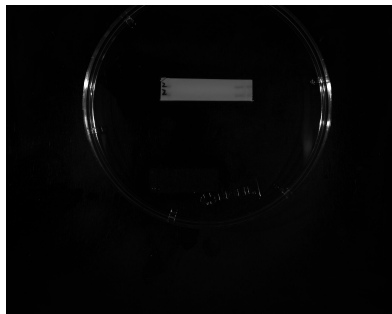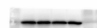

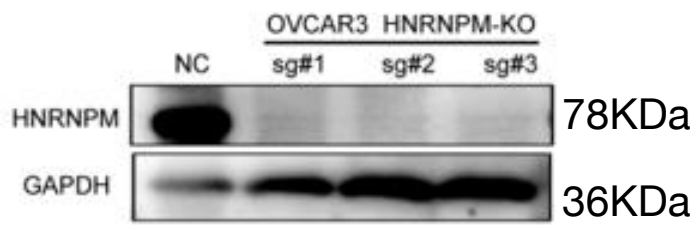

### HNRHPM

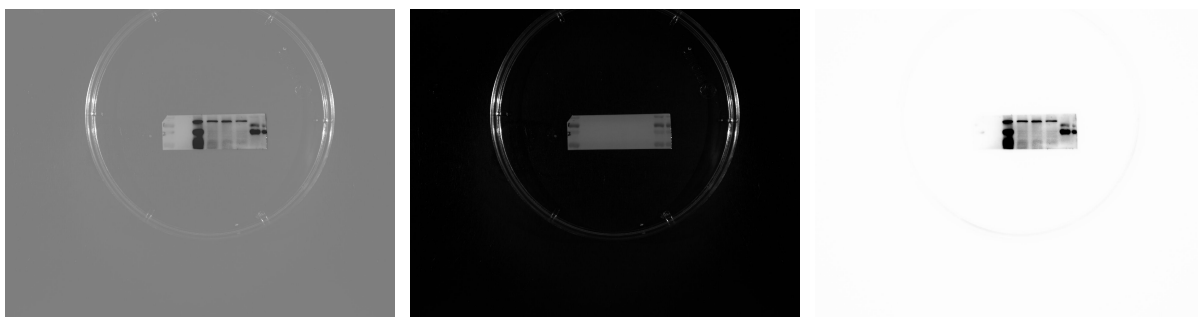

### GAPDH

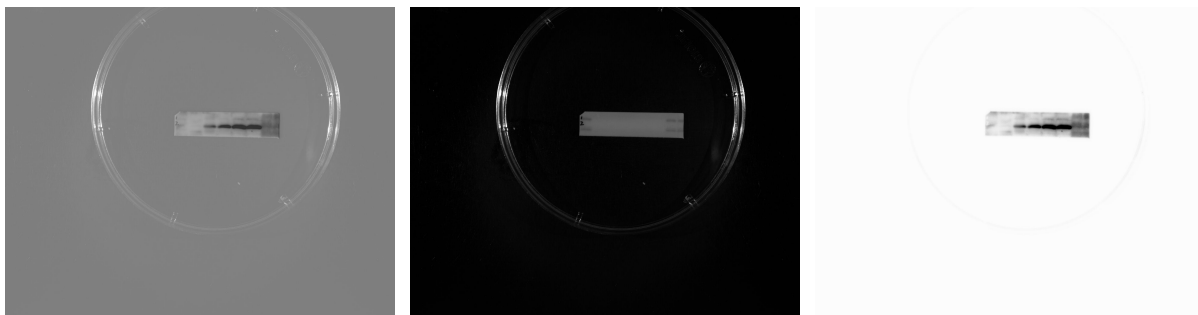

Supplement: Supplementary file 1 [file 138855c4aee291969e744ee6.pdf]

**B**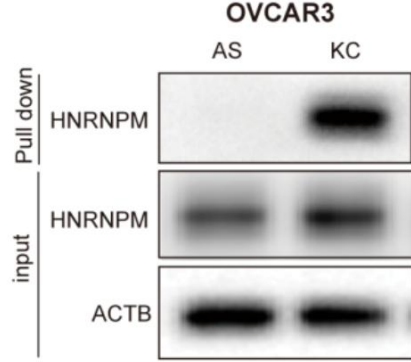**HNRNPM**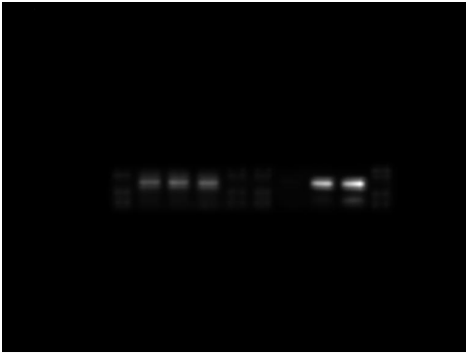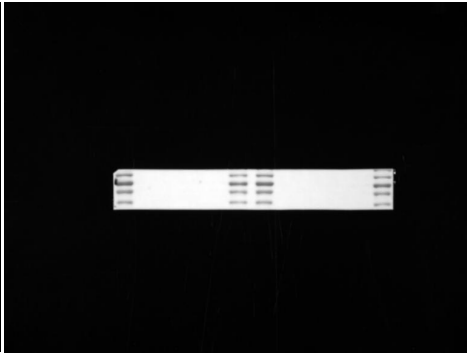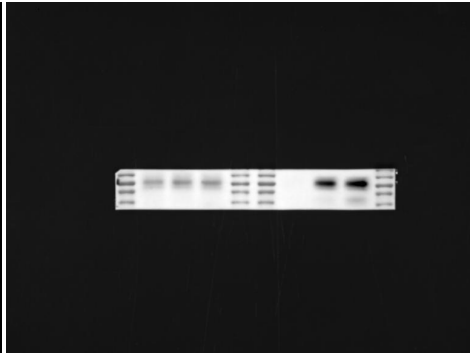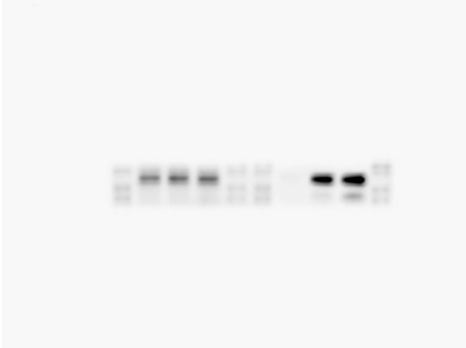 **$\beta$ -actin**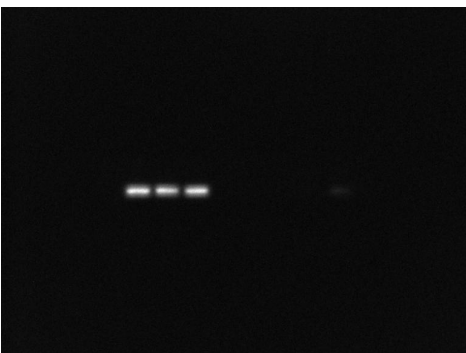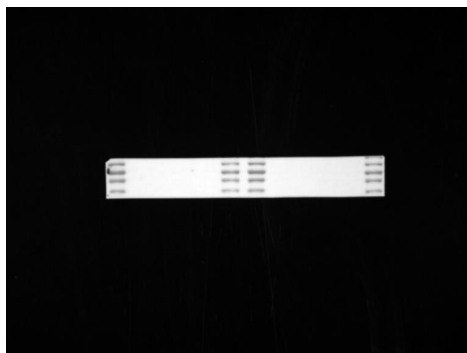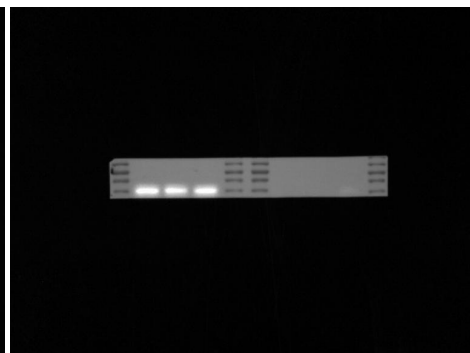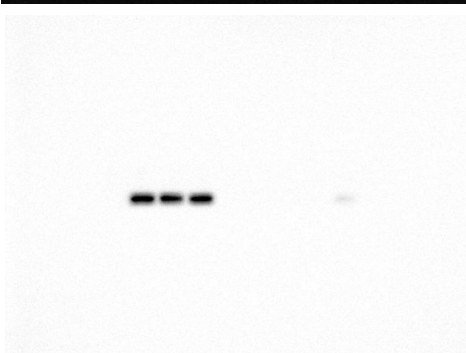

Supplement: Supplementary file 2 [file 44c9dfbe2b3f2c7a2a6f4b7d.pdf]

# HCC827

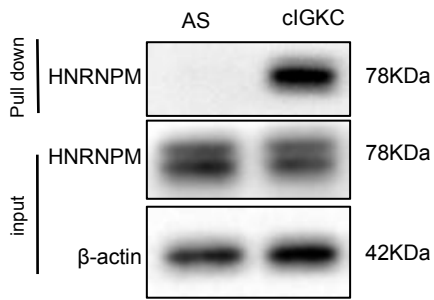

## HNRNPM

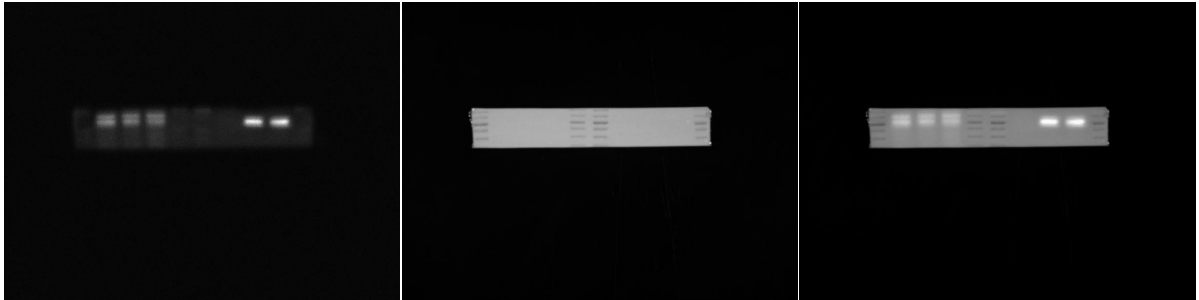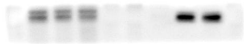

## $\beta$ -actin

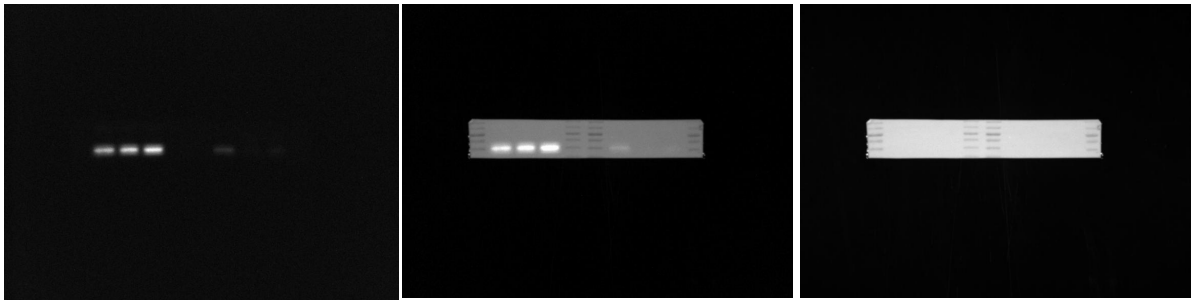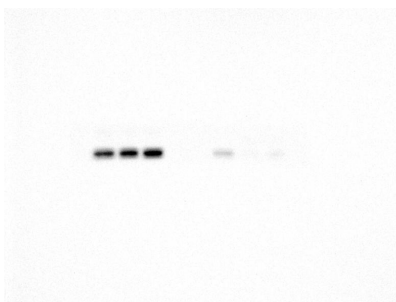

Supplement: Supplementary file 3 [file 6156dd73cd10d992b1f35367.pdf]

# HC827

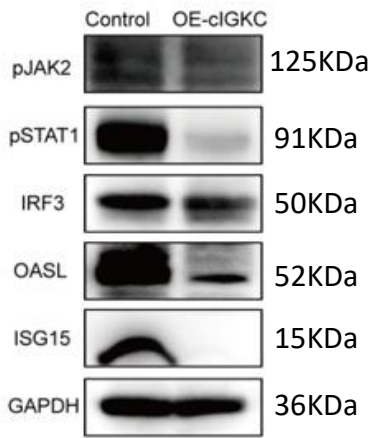

## pJAK2

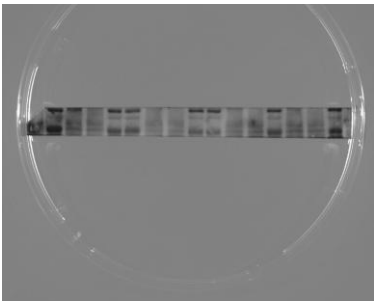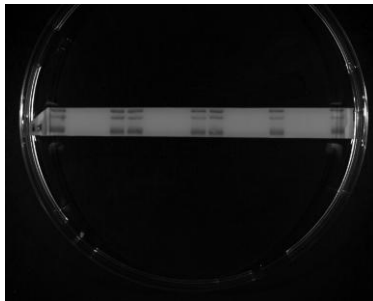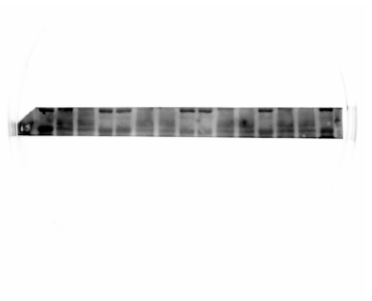

## pSTAT1

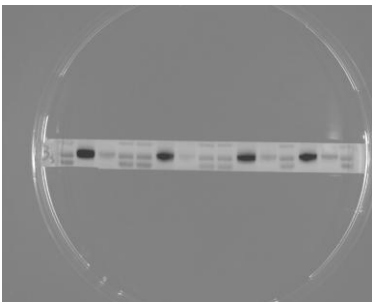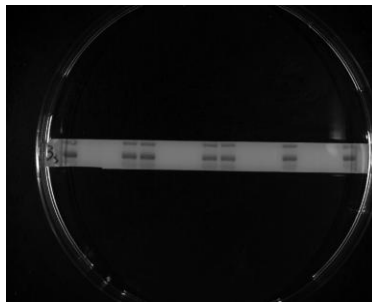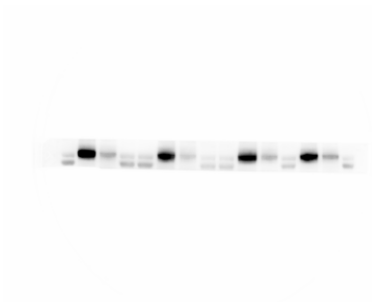

## IRF3

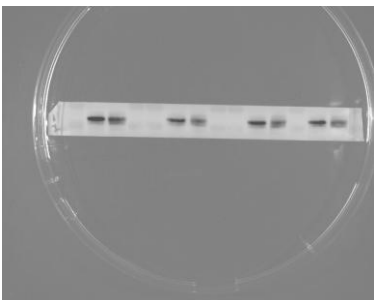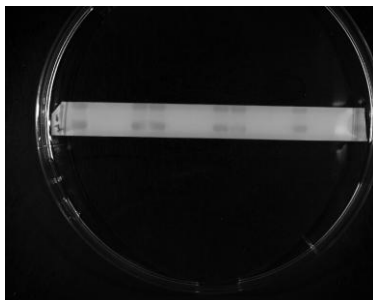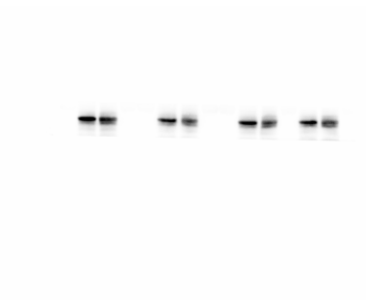

# OASL

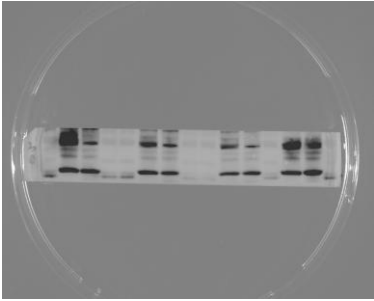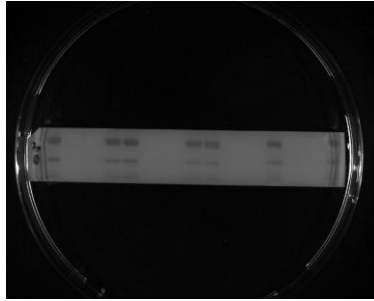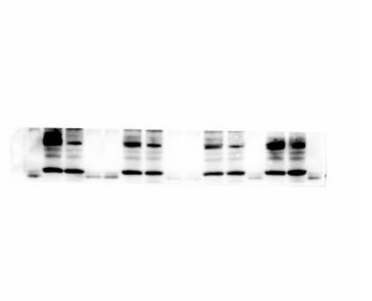

# ISG15

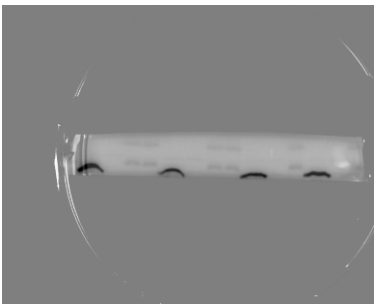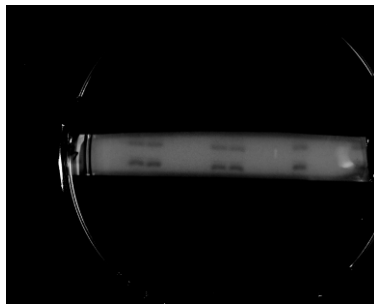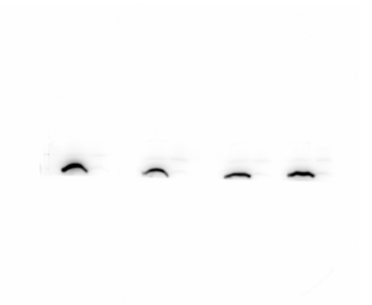

# GAPDH

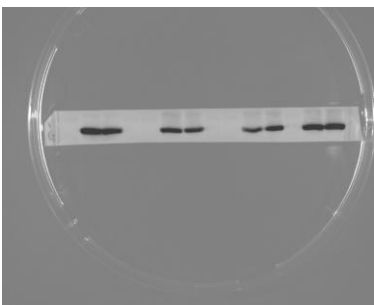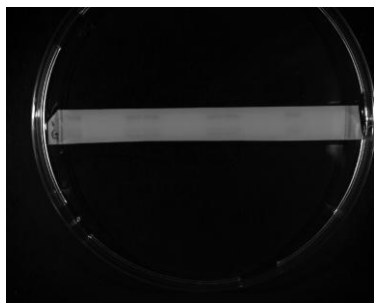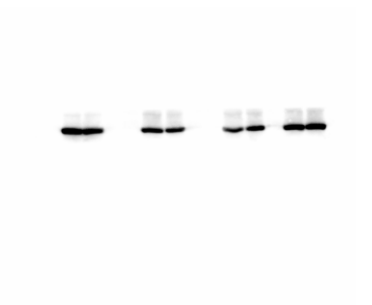

Supplement: Supplementary file 5 [file fac761f59e14f6818b9576e8.pdf]
